# Supplementary material
Source: PubMed Central journal article supplement (PMC8027938)
Supplement: jamacardiol-e210611-s001.pdf [file jamacardiol-e210611-s001.pdf]

## Supplementary Online Content

Bahiru E, Ziaieian B, Moucheraud C, et al. Association of dual eligibility for Medicare and Medicaid with heart failure quality and outcomes among Get With The Guidelines–Heart Failure hospitals. *JAMA Cardiol*. Published online April 7, 2021.

doi:10.1001/jamacardio.2021.0611

**eTable 1.** Variable Missing Rates and Imputation Details

**eTable 2.** Baseline Characteristics of Patients Hospitalized for Heart Failure at GWTG-HF Sites by Dual Eligibility Quintiles

**eTable 3.** Baseline Characteristics of Hospitals Participating in GWTG-HF Registry by Dual Eligibility Quintiles

**eTable 4.** Patient-Level and Hospital-Level, Treating Column Variable (DE Quintiles) as Ordinal

**eTable 5.** Composite Measures: Patient-Level Mean-Based Method, and Opportunity-Based Methods by Hospital and by DE Quintiles

**eTable 6.** Associations of Guideline-Based Care, and In-Hospital or 30d Outcomes With Dual Eligible Quintiles

**eTable 7.** Adjusted Model Adding Indicator Variable for Medical History Missing (MHM)

**eTable 8.** Baseline Characteristics, Quality Metric Achievement, and In-hospital End Points in the Sensitivity Cohort by DE Quintiles

This supplementary material has been provided by the authors to give readers additional information about their work.

**eTable 1. Variable Missing Rates and Imputation Details**

| Variable                             | Missing % |      |      |      |      |      | Note on imputation                        |
|--------------------------------------|-----------|------|------|------|------|------|-------------------------------------------|
|                                      | Overall   | Q1   | Q2   | Q3   | Q4   | Q5   |                                           |
| Age*                                 | 0.0       | 0.0  | 0.0  | 0.0  | 0.0  | 0.0  | N/A                                       |
| Sex                                  | 0.0       | 0.0  | 0.0  | 0.0  | 0.0  | 0.0  | N/A                                       |
| Race/Ethnicity                       | 1.3       | 2.5  | 1.5  | 0.9  | 0.6  | 0.4  | Grouped missing with Other/UTD/ND/Unknown |
| LVEF                                 | 2.5       | 3.1  | 1.8  | 2.4  | 2.0  | 3.9  | Multiple imputation                       |
| EF, %*                               | 6.2       | 7.8  | 5.6  | 5.7  | 5.0  | 7.8  |                                           |
| Medical History – Any except smoking | 4.3       | 4.2  | 6.0  | 2.2  | 5.2  | 2.7  | Impute to “No”                            |
| Medical History – Smoking            | 1.5       | 3.2  | 2.0  | 0.5  | 0.6  | 0.3  | Impute to “No”                            |
| Vitals on Admission                  |           |      |      |      |      |      |                                           |
| Heart Rate, bpm*                     | 26.9      | 20.1 | 40.1 | 27.3 | 17.6 | 23.9 | Multiple imputation                       |
| SBP, mmHg*                           | 28.0      | 20.9 | 40.8 | 28.8 | 19.3 | 24.8 | Multiple imputation                       |
| DBP, mmHg*                           | 28.0      | 20.8 | 40.8 | 28.8 | 19.3 | 24.7 |                                           |
| BMI*                                 | 56.8      | 54.0 | 71.2 | 52.4 | 46.2 | 53.6 |                                           |
| Lipids                               |           |      |      |      |      |      |                                           |
| Total Cholesterol, mg/dL*            | 87.0      | 86.4 | 91.3 | 84.9 | 84.4 | 85.5 |                                           |
| HDL, mg/dL*                          | 87.0      | 86.5 | 91.3 | 85.1 | 84.6 | 85.6 |                                           |
| LDL, mg/dL*                          | 86.7      | 84.3 | 90.9 | 85.7 | 85.0 | 86.0 |                                           |
| Triglycerides, mg/dL*                | 87.0      | 86.4 | 91.2 | 85.0 | 84.5 | 85.4 |                                           |
| Lab Measures                         |           |      |      |      |      |      |                                           |
| Serum sodium, mEq/L*                 | 45.9      | 42.7 | 55.6 | 42.2 | 41.4 | 42.9 | Multiple imputation                       |
| Hemoglobin, g/dL*                    | 64.5      | 66.0 | 75.4 | 57.3 | 57.8 | 59.6 |                                           |
| Albumin, g/dL*                       | 72.4      | 72.4 | 80.4 | 64.7 | 71.6 | 67.8 |                                           |
| BNP, pg/mL*                          | 74.8      | 75.0 | 83.1 | 72.9 | 64.1 | 76.0 |                                           |
| NBNP, pg/mL*                         | 87.7      | 88.0 | 89.5 | 85.9 | 91.5 | 80.2 |                                           |
| Serum creatinine, mg/dL*             | 33.3      | 30.0 | 41.5 | 31.5 | 29.5 | 29.9 | Multiple imputation                       |
| BUN, mg/dL*                          | 60.7      | 63.3 | 69.9 | 52.3 | 55.4 | 57.4 |                                           |
| Troponin, ng/dL*                     | 68.7      | 70.3 | 78.6 | 61.1 | 61.8 | 67.0 |                                           |
| Potassium, mEq/L*                    | 63.2      | 64.2 | 73.6 | 56.8 | 56.6 | 58.6 |                                           |
| HbA1C, %*                            | 91.4      | 92.9 | 94.1 | 87.7 | 90.0 | 90.4 |                                           |
| Blood Glucose, mg/dL*                | 76.1      | 76.7 | 83.4 | 67.2 | 73.0 | 77.6 |                                           |
| EKG QRS Duration, ms*                | 11.4      | 10.6 | 12.7 | 9.2  | 11.2 | 14.1 |                                           |
| Year of index HF                     | 0.0       | 0.0  | 0.0  | 0.0  | 0.0  | 0.0  |                                           |
| Hospital Characteristics             |           |      |      |      |      |      |                                           |
| Number of Beds*                      | 3.0       | 0.7  | 1.5  | 4.5  | 2.9  | 8.3  | Not imputed, complete case only           |
| Region                               | 0.0       | 0.0  | 0.0  | 0.0  | 0.0  | 0.0  | Not imputed, complete case only           |
| Rural Location                       | 2.8       | 5.7  | 0.9  | 1.5  | 3.4  | 2.5  | Not imputed, complete case only           |
| Teaching Status                      | 3.1       | 1.4  | 2.0  | 4.4  | 1.5  | 9.4  | Not imputed, complete case only           |
| Heart Transplant Hospital            | 29.1      | 32.2 | 23.2 | 28.7 | 28.2 | 38.9 |                                           |

**We used multiple imputation by fully conditional specification methods with 10 imputed datasets.** \*continuous variables; shaded variables are those included in adjusted models; LVEF: left ventricular ejection fraction; EF: ejection fraction; HF: heart failure, COPD: chronic obstructive pulmonary disease; CAD: coronary artery disease; MI: myocardial infarction; CVA: cerebrovascular accident; TIA: transient ischemic attack; ICD: implantable cardioverter defibrillator; Scr: serum creatinine; CRT-P: cardiac resynchronization therapy-pacemaker; CRT-D: cardiac resynchronization therapy-defibrillator; Hx: history; PCI: percutaneous coronary intervention; CABG: coronary artery bypass graft; bpm: beats per minute; SBP: systolic blood pressure; DBP: diastolic blood pressure; HDL: high-density lipoprotein; LDL: low-density lipoprotein; BNP: beta natriuretic peptide; NBNP: n-terminal-pro beta natriuretic peptide; BUN: blood urea nitrogen; HbA1C: hemoglobin A1C; EKG: electrocardiogram.

**eTable 2.** Baseline Characteristics of Patients Hospitalized for Heart Failure at GWTG-HF Sites by Dual Eligibility Quintiles

| Variable                       | Overall<br>N=258,995 | Q1<br>(0 - <13.3)<br>N=57,640 | Q2<br>(13.3 - <17.4)<br>N=70,336 | Q3<br>(17.4 - <23.16)<br>N=50,950 | Q4<br>(23.16 - <31.9)<br>N=49,100 | Q5<br>(31.9 - 83.3)<br>N=30,969 | P Value | % Std. Diff.<br>Q1 vs Q5 |
|--------------------------------|----------------------|-------------------------------|----------------------------------|-----------------------------------|-----------------------------------|---------------------------------|---------|--------------------------|
| <b>Demographics</b>            |                      |                               |                                  |                                   |                                   |                                 |         |                          |
| Age*                           | 81 (74 - 87)         | 82 (75 - 88)                  | 81 (74 - 87)                     | 80 (73 - 87)                      | 80 (73 - 87)                      | 80 (72 - 86)                    | <.0001  | 23.9                     |
| Female                         | 137,726 (53.2)       | 30,425 (52.8)                 | 37,066 (52.7)                    | 26,621 (52.2)                     | 26,205 (53.4)                     | 17,409 (56.2)                   | <.0001  | 6.9                      |
| <b>Race</b>                    |                      |                               |                                  |                                   |                                   |                                 |         |                          |
| ' Other (includes UTD)         | 6,179 (2.4)          | 1,196 (2.1)                   | 1,124 (1.6)                      | 1,138 (2.3)                       | 1,396 (2.9)                       | 1,325 (4.3)                     | <.0001  | 88.3                     |
| ' Asian                        | 3,859 (1.5)          | 678 (1.2)                     | 992 (1.4)                        | 522 (1.0)                         | 543 (1.1)                         | 1,124 (3.6)                     |         |                          |
| ' Hispanic (any race)          | 11,871 (4.6)         | 1,484 (2.6)                   | 1,299 (1.9)                      | 1,473 (2.9)                       | 2,394 (4.9)                       | 5,221 (16.9)                    |         |                          |
| ' Black                        | 26,202 (10.3)        | 2,975 (5.3)                   | 5,038 (7.3)                      | 4,827 (9.6)                       | 6,354 (13.0)                      | 7,008 (22.7)                    |         |                          |
| ' White                        | 207,504 (81.2)       | 49,860 (88.7)                 | 60,821 (87.8)                    | 42,539 (84.2)                     | 38,130 (78.1)                     | 16,154 (52.4)                   |         |                          |
| <b>LVEF**</b>                  |                      |                               |                                  |                                   |                                   |                                 |         |                          |
| ' Source of LVEF: Quantitative | 242,831 (96.2)       | 53,135 (95.1)                 | 66,428 (96.2)                    | 48,055 (96.6)                     | 46,663 (97.0)                     | 28,550 (95.9)                   | <.0001  | 3.9                      |
| ' Source of LVEF: Qualitative  | 9,708 (3.8)          | 2,723 (4.9)                   | 2,641 (3.8)                      | 1,692 (3.4)                       | 1,441 (3.0)                       | 1,211 (4.1)                     |         |                          |
| EF, %*                         | 48 (30 - 58)         | 50 (30 - 58)                  | 48 (30 - 58)                     | 47 (30 - 59)                      | 45 (30 - 58)                      | 47 (30 - 59)                    | <.0001  | 3.8                      |
| <b>EF groups*</b>              |                      |                               |                                  |                                   |                                   |                                 |         |                          |
| ' 50 <= OH_EF <=100            | 125,160 (49.6)       | 28,887 (51.7)                 | 34,407 (49.8)                    | 24,074 (48.4)                     | 23,223 (48.3)                     | 14,569 (49.0)                   | <.0001  | 5.9                      |
| ' 40 < OH_EF < 50              | 24,310 (9.6)         | 5,342 (9.6)                   | 6,830 (9.9)                      | 4,805 (9.7)                       | 4,498 (9.4)                       | 2,835 (9.5)                     |         |                          |
| ' 0 <= OH_EF <= 40             | 103,069 (40.8)       | 21,629 (38.7)                 | 27,832 (40.3)                    | 20,868 (41.9)                     | 20,383 (42.4)                     | 12,357 (41.5)                   |         |                          |
| EF groups missing              | 6,456 (2.5)          | 1,782 (3.1)                   | 1,267 (1.8)                      | 1,203 (2.4)                       | 996 (2.0)                         | 1,208 (3.9)                     | <.0001  | 4.4                      |
| <b>Year of HF Admission*</b>   |                      |                               |                                  |                                   |                                   |                                 |         |                          |
| ' 2017                         | 46,113 (17.8)        | 11,305 (19.6)                 | 11,796 (16.8)                    | 9,236 (18.1)                      | 8,713 (17.7)                      | 5,063 (16.3)                    | <.0001  | 19.7                     |
| ' 2016                         | 42,706 (16.5)        | 10,498 (18.2)                 | 11,354 (16.1)                    | 8,662 (17.0)                      | 7,373 (15.0)                      | 4,819 (15.6)                    |         |                          |
| ' 2015                         | 35,918 (13.9)        | 9,155 (15.9)                  | 9,876 (14.0)                     | 6,575 (12.9)                      | 6,233 (12.7)                      | 4,079 (13.2)                    |         |                          |
| ' 2014                         | 31,633 (12.2)        | 7,619 (13.2)                  | 9,106 (12.9)                     | 5,745 (11.3)                      | 5,490 (11.2)                      | 3,673 (11.9)                    |         |                          |
| ' 2013                         | 29,414 (11.4)        | 6,094 (10.6)                  | 8,344 (11.9)                     | 5,876 (11.5)                      | 5,292 (10.8)                      | 3,808 (12.3)                    |         |                          |
| ' 2012                         | 27,320 (10.5)        | 4,921 (8.5)                   | 7,931 (11.3)                     | 5,397 (10.6)                      | 5,483 (11.2)                      | 3,588 (11.6)                    |         |                          |
| ' 2011                         | 25,267 (9.8)         | 4,474 (7.8)                   | 7,153 (10.2)                     | 5,004 (9.8)                       | 5,348 (10.9)                      | 3,288 (10.6)                    |         |                          |
| ' 2010                         | 20,624 (8.0)         | 3,574 (6.2)                   | 4,776 (6.8)                      | 4,455 (8.7)                       | 5,168 (10.5)                      | 2,651 (8.6)                     |         |                          |
| <b>Medical History</b>         |                      |                               |                                  |                                   |                                   |                                 |         |                          |
| Atrial Flutter/Fibrillation    | 121,559 (49.0)       | 28,968 (52.4)                 | 33,485 (50.6)                    | 24,551 (49.3)                     | 22,272 (47.9)                     | 12,283 (40.7)                   | <.0001  | 23.6                     |
| COPD or Asthma                 | 84,990 (34.3)        | 18,202 (33.0)                 | 22,331 (33.8)                    | 17,515 (35.1)                     | 16,544 (35.6)                     | 10,398 (34.5)                   | <.0001  | 3.3                      |
| Diabetes                       | 104,762 (42.3)       | 21,747 (39.4)                 | 26,645 (40.3)                    | 21,880 (43.9)                     | 20,286 (43.6)                     | 14,204 (47.1)                   | <.0001  | 15.7                     |
| Hyperlipidemia                 | 144,563 (58.3)       | 32,355 (58.6)                 | 39,931 (60.4)                    | 29,970 (60.1)                     | 26,861 (57.7)                     | 15,446 (51.2)                   | <.0001  | 14.8                     |
| Hypertension                   | 204,702 (82.6)       | 45,562 (82.5)                 | 53,421 (80.8)                    | 41,511 (83.3)                     | 38,674 (83.1)                     | 25,534 (84.7)                   | <.0001  | 6.0                      |
| Peripheral Vascular Disease    | 35,119 (14.2)        | 7,811 (14.1)                  | 9,553 (14.4)                     | 7,744 (15.5)                      | 6,621 (14.2)                      | 3,390 (11.2)                    | <.0001  | 8.7                      |
| CAD                            | 135,483 (54.7)       | 30,049 (54.4)                 | 36,531 (55.2)                    | 27,561 (55.3)                     | 25,897 (55.6)                     | 15,445 (51.2)                   | <.0001  | 6.3                      |

| Variable                                                                             | Overall<br>N=258,995      | Q1<br>(0 - <13.3)<br>N=57,640 | Q2<br>(13.3 - <17.4)<br>N=70,336 | Q3<br>(17.4 - <23.16)<br>N=50,950 | Q4<br>(23.16 - <31.9)<br>N=49,100 | Q5<br>(31.9 - 83.3)<br>N=30,969 | P Value | % Std. Diff.<br>Q1 vs Q5 |
|--------------------------------------------------------------------------------------|---------------------------|-------------------------------|----------------------------------|-----------------------------------|-----------------------------------|---------------------------------|---------|--------------------------|
| Prior MI                                                                             | 52,909 (21.3)             | 11,244 (20.4)                 | 14,224 (21.5)                    | 10,972 (22.0)                     | 10,504 (22.6)                     | 5,965 (19.8)                    | <.0001  | 1.4                      |
| CVA/TIA                                                                              | 45,252 (18.3)             | 10,028 (18.2)                 | 12,112 (18.3)                    | 9,470 (19.0)                      | 8,395 (18.0)                      | 5,247 (17.4)                    | <.0001  | 2.0                      |
| ICD only                                                                             | 20,285 (8.2)              | 4,161 (7.5)                   | 5,878 (8.9)                      | 4,088 (8.2)                       | 3,685 (7.9)                       | 2,473 (8.2)                     | <.0001  | 2.5                      |
| Heart failure                                                                        | 182,182 (73.5)            | 39,499 (71.5)                 | 47,603 (72.0)                    | 37,051 (74.3)                     | 36,038 (77.4)                     | 21,991 (73.0)                   | <.0001  | 3.2                      |
| Anemia                                                                               | 61,273 (24.7)             | 12,880 (23.3)                 | 16,730 (25.3)                    | 13,105 (26.3)                     | 11,170 (24.0)                     | 7,388 (24.5)                    | <.0001  | 2.8                      |
| Pacemaker                                                                            | 44,556 (18.0)             | 10,798 (19.5)                 | 12,185 (18.4)                    | 8,853 (17.8)                      | 7,998 (17.2)                      | 4,722 (15.7)                    | <.0001  | 10.2                     |
| Dialysis, chronic                                                                    | 8,379 (3.4)               | 1,392 (2.5)                   | 1,915 (2.9)                      | 1,799 (3.6)                       | 1,487 (3.2)                       | 1,786 (5.9)                     | <.0001  | 17.0                     |
| Renal insufficiency, chronic (SCr>2.0)                                               | 65,436 (26.4)             | 13,794 (25.0)                 | 18,118 (27.4)                    | 12,914 (25.9)                     | 11,833 (25.4)                     | 8,777 (29.1)                    | <.0001  | 9.3                      |
| Depression                                                                           | 34,038 (13.7)             | 7,605 (13.8)                  | 9,237 (14.0)                     | 7,439 (14.9)                      | 6,206 (13.3)                      | 3,551 (11.8)                    | <.0001  | 6.0                      |
| Valvular Heart Disease                                                               | 56,801 (22.9)             | 13,234 (24.0)                 | 16,454 (24.9)                    | 11,926 (23.9)                     | 9,855 (21.2)                      | 5,332 (17.7)                    | <.0001  | 15.5                     |
| CRT-P                                                                                | 2,858 (1.2)               | 727 (1.3)                     | 694 (1.0)                        | 564 (1.1)                         | 571 (1.2)                         | 302 (1.0)                       | <.0001  | 2.9                      |
| CRT-D                                                                                | 15,364 (6.2)              | 3,567 (6.5)                   | 3,962 (6.0)                      | 3,217 (6.5)                       | 3,169 (6.8)                       | 1,449 (4.8)                     | <.0001  | 7.2                      |
| Ischemic Etiology: Med Hx of CAD, MI,<br>prior PCI, prior CABG, or prior<br>PCI/CABG | 147,541 (59.5)            | 32,647 (59.1)                 | 39,520 (59.8)                    | 30,029 (60.2)                     | 28,322 (60.9)                     | 17,023 (56.5)                   | <.0001  | 5.3                      |
| Medical History Panel Missing                                                        | 11,092 (4.3)              | 2,400 (4.2)                   | 4,201 (6.0)                      | 1,103 (2.2)                       | 2,564 (5.2)                       | 824 (2.7)                       | <.0001  | 8.3                      |
| Smoking                                                                              | 21,524 (8.4)              | 3,862 (6.9)                   | 5,495 (8.0)                      | 4,450 (8.8)                       | 4,692 (9.6)                       | 3,025 (9.8)                     | <.0001  | 10.4                     |
| Vitals on Admission                                                                  |                           |                               |                                  |                                   |                                   |                                 |         |                          |
| Heart Rate, bpm*                                                                     | 80 (70 - 94)              | 80 (70 - 93)                  | 81 (70 - 95)                     | 80 (70 - 94)                      | 81 (70 - 95)                      | 81 (70 - 95)                    | <.0001  | 4.3                      |
| SBP, mmHg*                                                                           | 137 (119 - 157)           | 137 (119 - 157)               | 138 (119 - 158)                  | 137 (118 - 157)                   | 138 (119 - 158)                   | 139 (120 - 158)                 | <.0001  | 5.5                      |
| DBP, mmHg*                                                                           | 73 (62 - 84)              | 72 (62 - 84)                  | 73 (63 - 85)                     | 73 (63 - 84)                      | 72 (62 - 84)                      | 73 (63 - 85)                    | <.0001  | 5.9                      |
| BMI*                                                                                 | 27.0 (23.0 -<br>32.2)     | 26.7 (22.9 -<br>31.7)         | 26.9 (23.0 -<br>32.1)            | 27.3 (23.4 -<br>32.6)             | 27.1 (23.1 -<br>32.4)             | 26.8 (22.9 -<br>32.1)           | <.0001  | 3.6                      |
| Lipids                                                                               |                           |                               |                                  |                                   |                                   |                                 |         |                          |
| Total Cholesterol, mg/dL*                                                            | 130 (107 - 158)           | 133 (111 - 162)               | 128 (105 - 156)                  | 128 (106 - 156)                   | 128 (106 - 157)                   | 130 (107 - 159)                 | <.0001  | 4.8                      |
| HDL, mg/dL*                                                                          | 40 (32 - 50)              | 42 (33 - 53)                  | 39 (31 - 49)                     | 40 (32 - 50)                      | 39 (31 - 50)                      | 40 (31 - 50)                    | <.0001  | 13.0                     |
| LDL, mg/dL*                                                                          | 70 (53 - 91)              | 70 (54 - 91)                  | 69 (52 - 90)                     | 69 (52 - 90)                      | 69 (52 - 92)                      | 71 (54 - 94)                    | <.0001  | 4.0                      |
| Triglycerides, mg/dL*                                                                | 86 (65 - 117)             | 88 (67 - 121)                 | 83 (61 - 112)                    | 87 (66 - 119)                     | 87 (66 - 118)                     | 84 (63 - 114)                   | <.0001  | 11.7                     |
| Lab Measures                                                                         |                           |                               |                                  |                                   |                                   |                                 |         |                          |
| Serum sodium, mEq/L*                                                                 | 138 (135 - 141)           | 139 (136 - 141)               | 138 (135 - 141)                  | 138 (135 - 141)                   | 139 (136 - 141)                   | 138 (135 - 141)                 | <.0001  | 9.1                      |
| Hemoglobin, g/dL*                                                                    | 11.5 (10.1 -<br>12.9)     | 11.6 (10.2 -<br>13.0)         | 11.5 (10.2 -<br>12.9)            | 11.5 (10.1 -<br>13.0)             | 11.4 (10.0 -<br>12.8)             | 11.3 (10.0 -<br>12.8)           | <.0001  | 10.6                     |
| Albumin, g/dL*                                                                       | 3.4 (3.0 - 3.7)           | 3.5 (3.1 - 3.8)               | 3.3 (3.0 - 3.6)                  | 3.4 (3.0 - 3.7)                   | 3.4 (3.0 - 3.7)                   | 3.4 (3.1 - 3.8)                 | <.0001  | 13.3                     |
| BNP, pg/mL*                                                                          | 854 (433 -<br>1,683)      | 833 (434 -<br>1,630)          | 891 (465 -<br>1,712)             | 901 (448 -<br>1,751)              | 785 (380 -<br>1,550)              | 941 (480 -<br>1,939)            | <.0001  | 12.8                     |
| NBNP, pg/mL*                                                                         | 5,811 (2,606 -<br>13,020) | 5,315 (2,486 -<br>11,673)     | 6,222 (2,874 -<br>13,659)        | 5,924 (2,659 -<br>13,025)         | 6,318 (2,807 -<br>13,926)         | 5,510 (2,187 -<br>13,249)       | <.0001  | 0.3                      |
| Serum creatinine, mg/dL*                                                             | 1.3 (1.0 - 1.9)           | 1.3 (1.0 - 1.8)               | 1.3 (1.0 - 1.9)                  | 1.3 (1.0 - 1.9)                   | 1.3 (1.0 - 1.9)                   | 1.3 (1.0 - 1.9)                 | <.0001  | 5.7                      |
| BUN, mg/dL*                                                                          | 27 (19 - 40)              | 27 (19 - 40)                  | 27 (19 - 40)                     | 27 (19 - 40)                      | 27 (19 - 41)                      | 27 (19 - 40)                    | 0.0002  | 0.1                      |
| Troponin, ng/dL*                                                                     | 0.04 (0.02 -              | 0.04 (0.02 -                  | 0.04 (0.02 -                     | 0.05 (0.02 -                      | 0.04 (0.02 -                      | 0.04 (0.03 -                    | <.0001  | 12.3                     |

| Variable                  | Overall<br>N=258,995 | Q1<br>(0 - <13.3)<br>N=57,640 | Q2<br>(13.3 - <17.4)<br>N=70,336 | Q3<br>(17.4 - <23.16)<br>N=50,950 | Q4<br>(23.16 - <31.9)<br>N=49,100 | Q5<br>(31.9 - 83.3)<br>N=30,969 | P Value | % Std. Diff.<br>Q1 vs Q5 |
|---------------------------|----------------------|-------------------------------|----------------------------------|-----------------------------------|-----------------------------------|---------------------------------|---------|--------------------------|
| Potassium, mEq/L*         | 4.2 (3.8 - 4.6)      | 4.2 (3.9 - 4.6)               | 4.2 (3.8 - 4.6)                  | 4.2 (3.8 - 4.6)                   | 4.2 (3.8 - 4.7)                   | 4.2 (3.8 - 4.7)                 | <.0001  | 0.7                      |
| HbA1C, %*                 | 6.5 (5.8 - 7.4)      | 6.5 (5.9 - 7.5)               | 6.6 (5.9 - 7.5)                  | 6.4 (5.8 - 7.3)                   | 6.5 (5.9 - 7.5)                   | 6.4 (5.8 - 7.4)                 | <.0001  | 8.6                      |
| Blood Glucose, mg/dL*     | 111 (94 - 142)       | 111 (94 - 139)                | 111 (95 - 140)                   | 110 (94 - 141)                    | 112 (94 - 144)                    | 113 (95 - 145)                  | <.0001  | 6.2                      |
| EKG QRS Duration, ms*     | 110 (90 - 144)       | 112 (92 - 146)                | 110 (90 - 145)                   | 110 (90 - 146)                    | 109 (90 - 144)                    | 106 (90 - 142)                  | <.0001  | 10.0                     |
| Hospital Characteristics  |                      |                               |                                  |                                   |                                   |                                 |         |                          |
| Number of Beds*           | 360 (228 - 510)      | 303 (232 - 391)               | 383 (218 - 628)                  | 379 (260 - 583)                   | 370 (200 - 524)                   | 376 (235 - 483)                 | <.0001  | 47.3                     |
| Geographic Region         |                      |                               |                                  |                                   |                                   |                                 |         |                          |
| ' West                    | 32,315 (12.5)        | 6,244 (10.8)                  | 6,127 (8.7)                      | 8,969 (17.6)                      | 3,852 (7.8)                       | 7,123 (23.0)                    | <.0001  | 65.4                     |
| ' South                   | 82,542 (31.9)        | 14,151 (24.6)                 | 19,496 (27.7)                    | 16,928 (33.2)                     | 20,203 (41.1)                     | 11,764 (38.0)                   |         |                          |
| ' Midwest                 | 67,237 (26.0)        | 19,060 (33.1)                 | 23,355 (33.2)                    | 15,899 (31.2)                     | 5,722 (11.7)                      | 3,201 (10.3)                    |         |                          |
| ' Northeast               | 76,901 (29.7)        | 18,185 (31.5)                 | 21,358 (30.4)                    | 9,154 (18.0)                      | 19,323 (39.4)                     | 8,881 (28.7)                    |         |                          |
| Rural Location            | 11,411 (4.5)         | 407 (0.7)                     | 1,961 (2.8)                      | 2,362 (4.7)                       | 4,519 (9.5)                       | 2,162 (7.2)                     | <.0001  | 33.4                     |
| Teaching Status           | 179,119 (71.4)       | 29,310 (51.6)                 | 53,102 (77.0)                    | 38,795 (79.6)                     | 35,011 (72.4)                     | 22,901 (81.7)                   | <.0001  | 67.3                     |
| Heart Transplant Hospital | 18,292 (10.0)        | 2,537 (6.5)                   | 4,918 (9.1)                      | 8,983 (24.7)                      | 1,683 (4.8)                       | 171 (0.9)                       | <.0001  | 29.9                     |

\* Continuous variables. \*\*LVEF assessment before arrival, during hospitalization, or if planned after discharge; LVEF: left ventricular ejection fraction, EF: ejection fraction, HF: heart failure, COPD: chronic obstructive pulmonary disease, CAD: coronary artery disease, MI: myocardial infarction, CVA: cerebrovascular accident, TIA: transient ischemic attack, ICD: implantable cardioverter defibrillator, Scr: serum creatinine, CRT-P: cardiac resynchronization therapy-pacemaker, CRT-D: cardiac resynchronization therapy-defibrillator, Hx: history, PCI: percutaneous coronary intervention, CABG: coronary artery bypass graft, bpm: beats per minute, SBP: systolic blood pressure, DBP: diastolic blood pressure, HDL: high-density lipoprotein, LDL: low-density lipoprotein, BNP: beta natriuretic peptide, NBNP: n-terminal-pro beta natriuretic peptide, BUN: blood urea nitrogen, HbA1C: hemoglobin A1C, EKG: electrocardiogram.

**eTable 3.** Baseline Characteristics of Hospitals Participating in GWTG-HF Registry by Dual Eligibility Quintiles.

| Variable                  | Overall<br>N=455 | Q1<br>(0 - <13.3)<br>N= 91 | Q2<br>(13.3 - <17.4)<br>N= 91 | Q3<br>(17.4 - <23.16)<br>N= 91 | Q4<br>(23.16 - <31.9)<br>N= 91 | Q5<br>(31.9 - 83.3)<br>N= 91 | P<br>Value | % Std.<br>Diff.<br>Q1 vs Q5 |
|---------------------------|------------------|----------------------------|-------------------------------|--------------------------------|--------------------------------|------------------------------|------------|-----------------------------|
| Hospital Characteristics  |                  |                            |                               |                                |                                |                              |            |                             |
| Number of Beds*           | 276 (160 - 432)  | 254 (145 - 379)            | 238 (164 - 432)               | 310 (206 - 458)                | 270 (158 - 417)                | 342 (179 - 482)              | 0.1460     | 37.1                        |
| Geographic Region         |                  |                            |                               |                                |                                |                              | 0.0052     | 58.3                        |
| ' West                    | 75 (16.5)        | 14 (15.4)                  | 14 (15.4)                     | 15 (16.5)                      | 10 (11.0)                      | 22 (24.2)                    |            |                             |
| ' South                   | 152 (33.4)       | 25 (27.5)                  | 25 (27.5)                     | 29 (31.9)                      | 39 (42.9)                      | 34 (37.4)                    |            |                             |
| ' Midwest                 | 111 (24.4)       | 31 (34.1)                  | 28 (30.8)                     | 28 (30.8)                      | 14 (15.4)                      | 10 (11.0)                    |            |                             |
| ' Northeast               | 117 (25.7)       | 21 (23.1)                  | 24 (26.4)                     | 19 (20.9)                      | 28 (30.8)                      | 25 (27.5)                    |            |                             |
| Rural Location            | 40 (9.2)         | 2 (2.4)                    | 6 (6.7)                       | 11 (12.6)                      | 10 (11.6)                      | 11 (12.2)                    | 0.0826     | 38.7                        |
| Teaching Status           | 271 (63.9)       | 49 (55.1)                  | 54 (62.8)                     | 56 (65.9)                      | 53 (60.9)                      | 59 (76.6)                    | 0.0629     | 46.7                        |
| Heart Transplant Hospital | 20 (7.3)         | 2 (3.5)                    | 4 (6.5)                       | 8 (15.7)                       | 4 (7.8)                        | 2 (3.8)                      | 0.1133     | 1.8                         |
| Dual Eligibility Rate*    | 20 (14 - 29)     | 11 (9 - 12)                | 15 (14 - 17)                  | 20 (19 - 21)                   | 27 (25 - 29)                   | 46 (36 - 57)                 | <.0001     | 400.2                       |

\* Continuous variables.

**eTable 4.** Patient-Level and Hospital-Level, Treating Column Variable (DE Quintiles) as Ordinal

| Variable            | Level                        | Overall<br>(N=258995) |       | Q1<br>(N=57640) |       | Q2<br>(N=70336) |       | Q3<br>(N=50950) |       | Q4<br>(N=49100) |       | Q5<br>(N=30969) |       | P-value+ |       |       |       |       |      |
|---------------------|------------------------------|-----------------------|-------|-----------------|-------|-----------------|-------|-----------------|-------|-----------------|-------|-----------------|-------|----------|-------|-------|-------|-------|------|
| <u>Demographics</u> |                              |                       |       |                 |       |                 |       |                 |       |                 |       |                 |       |          |       |       |       |       |      |
| Age*                | Median                       | 258995                | 81.0  | 57640           | 82.0  | 70336           | 81.0  | 50950           | 80.0  | 49100           | 80.0  | 30969           | 80.0  | <.0001   |       |       |       |       |      |
|                     | 25th                         |                       | 74.0  |                 | 75.0  |                 | 74.0  |                 | 73.0  |                 | 73.0  |                 | 72.0  |          |       |       |       |       |      |
|                     | 75th                         |                       | 87.0  |                 | 88.0  |                 | 87.0  |                 | 87.0  |                 | 87.0  |                 | 86.0  |          |       |       |       |       |      |
|                     | Mean                         |                       | 80.5  |                 | 81.5  |                 | 80.9  |                 | 80.0  |                 | 80.0  |                 | 79.5  |          |       |       |       |       |      |
|                     | STD                          |                       | 8.5   |                 | 8.4   |                 | 8.5   |                 | 8.5   |                 | 8.5   |                 | 8.7   |          |       |       |       |       |      |
|                     | Min                          |                       | 65.0  |                 | 65.0  |                 | 65.0  |                 | 65.0  |                 | 65.0  |                 | 65.0  |          |       |       |       |       |      |
|                     | Max                          |                       | 110.0 |                 | 110.0 |                 | 109.0 |                 | 109.0 |                 | 110.0 |                 | 106.0 |          |       |       |       |       |      |
|                     | Missing (%)                  |                       | 0.0   |                 | 0.0   |                 | 0.0   |                 | 0.0   |                 | 0.0   |                 | 0.0   |          |       |       |       |       |      |
| Female              | Yes                          | 137726                | 53.2  | 30425           | 52.8  | 37066           | 52.7  | 26621           | 52.2  | 26205           | 53.4  | 17409           | 56.2  | <.0001   |       |       |       |       |      |
|                     | No                           | 121269                | 46.8  |                 | 47.2  |                 | 33270 |                 | 47.3  |                 | 24329 |                 | 47.8  |          | 22895 | 46.6  | 13560 | 43.8  |      |
| Race                | Other (includes UTD)         | 6179                  | 2.4   | 1196            | 2.1   | 1124            | 1.6   | 1138            | 2.3   | 1396            | 2.9   | 1325            | 4.3   | <.0001   |       |       |       |       |      |
|                     | Asian                        | 3859                  | 1.5   |                 | 678   |                 | 1.2   |                 | 992   |                 | 1.4   |                 | 522   |          | 1.0   | 543   | 1.1   | 1124  | 3.6  |
|                     | Hispanic (any race)          | 11871                 | 4.6   |                 | 1484  |                 | 2.6   |                 | 1299  |                 | 1.9   |                 | 1473  |          | 2.9   | 2394  | 4.9   | 5221  | 16.9 |
|                     | Black                        | 26202                 | 10.3  |                 | 2975  |                 | 5.3   |                 | 5038  |                 | 7.3   |                 | 4827  |          | 9.6   | 6354  | 13.0  | 7008  | 22.7 |
|                     | White                        | 207504                | 81.2  |                 | 49860 |                 | 88.7  |                 | 60821 |                 | 87.8  |                 | 42539 |          | 84.2  | 38130 | 78.1  | 16154 | 52.4 |
|                     | Missing                      | 3380                  | 1.3   |                 | 1447  |                 | 2.5   |                 | 1062  |                 | 1.5   |                 | 451   |          | 0.9   | 283   | 0.6   | 137   | 0.4  |
| LVEF Source         | Source of LVEF: Quantitative | 242831                | 96.2  | 53135           | 95.1  | 66428           | 96.2  | 48055           | 96.6  | 46663           | 97.0  | 28550           | 95.9  | <.0001   |       |       |       |       |      |
|                     | Source of LVEF: Qualitative  | 9708                  | 3.8   |                 | 4.9   |                 | 2641  |                 | 3.8   |                 | 1692  |                 | 3.4   |          | 1441  | 3.0   | 1211  | 4.1   |      |
|                     | Missing                      | 6456                  | 2.5   |                 | 1782  |                 | 3.1   |                 | 1267  |                 | 1.8   |                 | 1203  |          | 2.4   | 996   | 2.0   | 1208  | 3.9  |
| EF, %*              | Median                       | 242831                | 48.0  |                 | 50.0  | 66428           | 48.0  | 48055           | 47.0  | 46663           | 45.0  | 28550           | 47.0  | <.0001   |       |       |       |       |      |

| Variable                    | Level             | Overall<br>(N=258995) |      | Q1<br>(N=57640) |      | Q2<br>(N=70336) |      | Q3<br>(N=50950) |      | Q4<br>(N=49100) |      | Q5<br>(N=30969) |      | P-value+ |
|-----------------------------|-------------------|-----------------------|------|-----------------|------|-----------------|------|-----------------|------|-----------------|------|-----------------|------|----------|
|                             |                   |                       |      | 53135           |      |                 |      |                 |      |                 |      |                 |      |          |
|                             | 25th              |                       | 30.0 |                 | 30.0 |                 | 30.0 |                 | 30.0 |                 | 30.0 |                 | 30.0 |          |
|                             | 75th              |                       | 58.0 |                 | 58.0 |                 | 58.0 |                 | 59.0 |                 | 58.0 |                 | 59.0 |          |
|                             | Mean              |                       | 44.6 |                 | 45.3 |                 | 44.6 |                 | 44.7 |                 | 43.8 |                 | 44.6 |          |
|                             | STD               |                       | 16.7 |                 | 16.5 |                 | 16.6 |                 | 16.9 |                 | 16.5 |                 | 17.0 |          |
|                             | Min               |                       | 5.0  |                 | 5.0  |                 | 5.0  |                 | 5.0  |                 | 5.0  |                 | 5.0  |          |
|                             | Max               |                       | 95.0 |                 | 90.0 |                 | 94.0 |                 | 95.0 |                 | 94.0 |                 | 95.0 |          |
|                             | Missing (%)       |                       | 6.2  |                 | 7.8  |                 | 5.6  |                 | 5.7  |                 | 5.0  |                 | 7.8  |          |
| EF groups*                  | 50 <= OH_EF <=100 | 125160                | 49.6 | 28887           | 51.7 | 34407           | 49.8 | 24074           | 48.4 | 23223           | 48.3 | 14569           | 49.0 | <.0001   |
|                             | 40 < OH_EF < 50   | 24310                 | 9.6  | 5342            | 9.6  | 6830            | 9.9  | 4805            | 9.7  | 4498            | 9.4  | 2835            | 9.5  |          |
|                             | 0 <= OH_EF <= 40  | 103069                | 40.8 | 21629           | 38.7 | 27832           | 40.3 | 20868           | 41.9 | 20383           | 42.4 | 12357           | 41.5 |          |
|                             | Missing           | 6456                  | 2.5  | 1782            | 3.1  | 1267            | 1.8  | 1203            | 2.4  | 996             | 2.0  | 1208            | 3.9  |          |
| EF groups missing           | Yes               | 6456                  | 2.5  | 1782            | 3.1  | 1267            | 1.8  | 1203            | 2.4  | 996             | 2.0  | 1208            | 3.9  | 0.0133   |
|                             | No                | 252539                | 97.5 | 55858           | 96.9 | 69069           | 98.2 | 49747           | 97.6 | 48104           | 98.0 | 29761           | 96.1 |          |
| <u>Medical History</u>      |                   |                       |      |                 |      |                 |      |                 |      |                 |      |                 |      |          |
| Atrial Flutter/Fibrillation | Yes               | 121559                | 49.0 | 28968           | 52.4 | 33485           | 50.6 | 24551           | 49.3 | 22272           | 47.9 | 12283           | 40.7 | <.0001   |
|                             | No                | 126344                | 51.0 | 26272           | 47.6 | 32650           | 49.4 | 25296           | 50.7 | 24264           | 52.1 | 17862           | 59.3 |          |
|                             | Missing           | 11092                 | 4.3  | 2400            | 4.2  | 4201            | 6.0  | 1103            | 2.2  | 2564            | 5.2  | 824             | 2.7  |          |
| COPD or Asthma              | Yes               | 84990                 | 34.3 | 18202           | 33.0 | 22331           | 33.8 | 17515           | 35.1 | 16544           | 35.6 | 10398           | 34.5 | <.0001   |
|                             | No                | 162913                | 65.7 | 37038           | 67.0 | 43804           | 66.2 | 32332           | 64.9 | 29992           | 64.4 | 19747           | 65.5 |          |
|                             | Missing           | 11092                 | 4.3  | 2400            | 4.2  | 4201            | 6.0  | 1103            | 2.2  | 2564            | 5.2  | 824             | 2.7  |          |
| Diabetes                    | Yes               | 104762                | 42.3 | 21747           | 39.4 | 26645           | 40.3 | 21880           | 43.9 | 20286           | 43.6 | 14204           | 47.1 | <.0001   |



| Variable                    | Level   | Overall<br>(N=258995) |      | Q1<br>(N=57640) |      | Q2<br>(N=70336) |      | Q3<br>(N=50950) |      | Q4<br>(N=49100) |      | Q5<br>(N=30969) |      | P-value+ |
|-----------------------------|---------|-----------------------|------|-----------------|------|-----------------|------|-----------------|------|-----------------|------|-----------------|------|----------|
| Hyperlipidemia              | No      | 143141                | 57.7 | 33493           | 60.6 | 39490           | 59.7 | 27967           | 56.1 | 26250           | 56.4 | 15941           | 52.9 | <.0001   |
|                             | Missing | 11092                 | 4.3  | 2400            | 4.2  | 4201            | 6.0  | 1103            | 2.2  | 2564            | 5.2  | 824             | 2.7  |          |
|                             | Yes     | 144563                | 58.3 | 32355           | 58.6 | 39931           | 60.4 | 29970           | 60.1 | 26861           | 57.7 | 15446           | 51.2 |          |
|                             | No      | 103340                | 41.7 | 22885           | 41.4 | 26204           | 39.6 | 19877           | 39.9 | 19675           | 42.3 | 14699           | 48.8 |          |
|                             | Missing | 11092                 | 4.3  | 2400            | 4.2  | 4201            | 6.0  | 1103            | 2.2  | 2564            | 5.2  | 824             | 2.7  |          |
| Hypertension                | Yes     | 204702                | 82.6 | 45562           | 82.5 | 53421           | 80.8 | 41511           | 83.3 | 38674           | 83.1 | 25534           | 84.7 | <.0001   |
|                             | No      | 43201                 | 17.4 | 9678            | 17.5 | 12714           | 19.2 | 8336            | 16.7 | 7862            | 16.9 | 4611            | 15.3 |          |
|                             | Missing | 11092                 | 4.3  | 2400            | 4.2  | 4201            | 6.0  | 1103            | 2.2  | 2564            | 5.2  | 824             | 2.7  |          |
| Peripheral Vascular Disease | Yes     | 35119                 | 14.2 | 7811            | 14.1 | 9553            | 14.4 | 7744            | 15.5 | 6621            | 14.2 | 3390            | 11.2 | <.0001   |
|                             | No      | 212784                | 85.8 | 47429           | 85.9 | 56582           | 85.6 | 42103           | 84.5 | 39915           | 85.8 | 26755           | 88.8 |          |
|                             | Missing | 11092                 | 4.3  | 2400            | 4.2  | 4201            | 6.0  | 1103            | 2.2  | 2564            | 5.2  | 824             | 2.7  |          |
| CAD                         | Yes     | 135483                | 54.7 | 30049           | 54.4 | 36531           | 55.2 | 27561           | 55.3 | 25897           | 55.6 | 15445           | 51.2 | <.0001   |
|                             | No      | 112420                | 45.3 | 25191           | 45.6 | 29604           | 44.8 | 22286           | 44.7 | 20639           | 44.4 | 14700           | 48.8 |          |
|                             | Missing | 11092                 | 4.3  | 2400            | 4.2  | 4201            | 6.0  | 1103            | 2.2  | 2564            | 5.2  | 824             | 2.7  |          |
| Prior MI                    | Yes     | 52909                 | 21.3 | 11244           | 20.4 | 14224           | 21.5 | 10972           | 22.0 | 10504           | 22.6 | 5965            | 19.8 | 0.0014   |
|                             | No      | 194994                | 78.7 | 43996           | 79.6 | 51911           | 78.5 | 38875           | 78.0 | 36032           | 77.4 | 24180           | 80.2 |          |
|                             | Missing | 11092                 | 4.3  | 2400            | 4.2  | 4201            | 6.0  | 1103            | 2.2  | 2564            | 5.2  | 824             | 2.7  |          |
| CVATIA                      | Yes     | 45252                 | 18.3 |                 | 18.2 | 12112           | 18.3 | 9470            | 19.0 | 8395            | 18.0 | 5247            | 17.4 | 0.0920   |

| Variable          | Level   | Overall<br>(N=258995) |      | Q1<br>(N=57640) |      | Q2<br>(N=70336) |      | Q3<br>(N=50950) |      | Q4<br>(N=49100) |      | Q5<br>(N=30969) |      | P-value+ |
|-------------------|---------|-----------------------|------|-----------------|------|-----------------|------|-----------------|------|-----------------|------|-----------------|------|----------|
| ICD only          | No      | 202651                | 81.7 | 10028           | 81.8 | 54023           | 81.7 | 40377           | 81.0 | 38141           | 82.0 | 24898           | 82.6 | 0.2850   |
|                   | Missing | 11092                 | 4.3  | 45212           | 4.2  | 4201            | 6.0  | 1103            | 2.2  | 2564            | 5.2  | 824             | 2.7  |          |
|                   | Yes     | 20285                 | 8.2  | 2400            | 7.5  | 5878            | 8.9  | 4088            | 8.2  | 3685            | 7.9  | 2473            | 8.2  |          |
|                   | No      | 227618                | 91.8 | 4161            | 92.5 | 60257           | 91.1 | 45759           | 91.8 | 42851           | 92.1 | 27672           | 91.8 |          |
|                   | Missing | 11092                 | 4.3  | 51079           | 4.2  | 4201            | 6.0  | 1103            | 2.2  | 2564            | 5.2  | 824             | 2.7  |          |
| Heart failure     | Yes     | 182182                | 73.5 | 39499           | 71.5 | 47603           | 72.0 | 37051           | 74.3 | 36038           | 77.4 | 21991           | 73.0 | <.0001   |
|                   | No      | 65721                 | 26.5 | 15741           | 28.5 | 18532           | 28.0 | 12796           | 25.7 | 10498           | 22.6 | 8154            | 27.0 |          |
|                   | Missing | 11092                 | 4.3  | 2400            | 4.2  | 4201            | 6.0  | 1103            | 2.2  | 2564            | 5.2  | 824             | 2.7  |          |
| Anemia            | Yes     | 61273                 | 24.7 | 12880           | 23.3 | 16730           | 25.3 | 13105           | 26.3 | 11170           | 24.0 | 7388            | 24.5 | 0.0014   |
|                   | No      | 186630                | 75.3 | 42360           | 76.7 | 49405           | 74.7 | 36742           | 73.7 | 35366           | 76.0 | 22757           | 75.5 |          |
|                   | Missing | 11092                 | 4.3  | 2400            | 4.2  | 4201            | 6.0  | 1103            | 2.2  | 2564            | 5.2  | 824             | 2.7  |          |
| Pacemaker         | Yes     | 44556                 | 18.0 | 10798           | 19.5 | 12185           | 18.4 | 8853            | 17.8 | 7998            | 17.2 | 4722            | 15.7 | <.0001   |
|                   | No      | 203347                | 82.0 | 44442           | 80.5 | 53950           | 81.6 | 40994           | 82.2 | 38538           | 82.8 | 25423           | 84.3 |          |
|                   | Missing | 11092                 | 4.3  | 2400            | 4.2  | 4201            | 6.0  | 1103            | 2.2  | 2564            | 5.2  | 824             | 2.7  |          |
| Dialysis, chronic | Yes     | 8379                  | 3.4  | 1392            | 2.5  | 1915            | 2.9  | 1799            | 3.6  | 1487            | 3.2  | 1786            | 5.9  | <.0001   |
|                   | No      | 239524                | 96.6 | 53848           | 97.5 | 64220           | 97.1 | 48048           | 96.4 | 45049           | 96.8 | 28359           | 94.1 |          |
|                   | Missing | 11092                 | 4.3  | 2400            | 4.2  | 4201            | 6.0  | 1103            | 2.2  | 2564            | 5.2  | 824             | 2.7  |          |

| Variable                                                                       | Level   | Overall<br>(N=258995) |      | Q1<br>(N=57640) |      | Q2<br>(N=70336) |      | Q3<br>(N=50950) |      | Q4<br>(N=49100) |      | Q5<br>(N=30969) |      | P-value+ |
|--------------------------------------------------------------------------------|---------|-----------------------|------|-----------------|------|-----------------|------|-----------------|------|-----------------|------|-----------------|------|----------|
| Renal insufficiency, chronic (SCr>2.0)                                         | Yes     | 65436                 | 26.4 | 13794           | 25.0 | 18118           | 27.4 | 12914           | 25.9 | 11833           | 25.4 | 8777            | 29.1 | <.0001   |
|                                                                                | No      | 182467                | 73.6 | 41446           | 75.0 | 48017           | 72.6 | 36933           | 74.1 | 34703           | 74.6 | 21368           | 70.9 |          |
|                                                                                | Missing | 11092                 | 4.3  | 2400            | 4.2  | 4201            | 6.0  | 1103            | 2.2  | 2564            | 5.2  | 824             | 2.7  |          |
| Depression                                                                     | Yes     | 34038                 | 13.7 | 7605            | 13.8 | 9237            | 14.0 | 7439            | 14.9 | 6206            | 13.3 | 3551            | 11.8 | <.0001   |
|                                                                                | No      | 213865                | 86.3 | 47635           | 86.2 | 56898           | 86.0 | 42408           | 85.1 | 40330           | 86.7 | 26594           | 88.2 |          |
|                                                                                | Missing | 11092                 | 4.3  | 2400            | 4.2  | 4201            | 6.0  | 1103            | 2.2  | 2564            | 5.2  | 824             | 2.7  |          |
| Valvular Heart Disease                                                         | Yes     | 56801                 | 22.9 | 13234           | 24.0 | 16454           | 24.9 | 11926           | 23.9 | 9855            | 21.2 | 5332            | 17.7 | <.0001   |
|                                                                                | No      | 191102                | 77.1 | 42006           | 76.0 | 49681           | 75.1 | 37921           | 76.1 | 36681           | 78.8 | 24813           | 82.3 |          |
|                                                                                | Missing | 11092                 | 4.3  | 2400            | 4.2  | 4201            | 6.0  | 1103            | 2.2  | 2564            | 5.2  | 824             | 2.7  |          |
| CRT-P (cardiac resynchronization therapy-pacing only)                          | Yes     | 2858                  | 1.2  | 727             | 1.3  | 694             | 1.0  | 564             | 1.1  | 571             | 1.2  | 302             | 1.0  | 0.0153   |
|                                                                                | No      | 245045                | 98.8 | 54513           | 98.7 | 65441           | 99.0 | 49283           | 98.9 | 45965           | 98.8 | 29843           | 99.0 |          |
|                                                                                | Missing | 11092                 | 4.3  | 2400            | 4.2  | 4201            | 6.0  | 1103            | 2.2  | 2564            | 5.2  | 824             | 2.7  |          |
| CRT-D (cardiac resynchronization therapy with ICD)                             | Yes     | 15364                 | 6.2  | 3567            | 6.5  | 3962            | 6.0  | 3217            | 6.5  | 3169            | 6.8  | 1449            | 4.8  | 0.0002   |
|                                                                                | No      | 232539                | 93.8 | 51673           | 93.5 | 62173           | 94.0 | 46630           | 93.5 | 43367           | 93.2 | 28696           | 95.2 |          |
|                                                                                | Missing | 11092                 | 4.3  | 2400            | 4.2  | 4201            | 6.0  | 1103            | 2.2  | 2564            | 5.2  | 824             | 2.7  |          |
| Ischemic Etiology: Med Hx of CAD, MI, prior PCI, prior CABG, or prior PCI/CABG | Yes     | 147541                | 59.5 | 32647           | 59.1 | 39520           | 59.8 | 30029           | 60.2 | 28322           | 60.9 | 17023           | 56.5 | 0.0669   |
|                                                                                | No      | 100362                | 40.5 | 22593           | 40.9 | 26615           | 40.2 | 19818           | 39.8 | 18214           | 39.1 | 13122           | 43.5 |          |
|                                                                                | Missing | 11092                 | 4.3  | 2400            | 4.2  | 4201            | 6.0  | 1103            | 2.2  | 2564            | 5.2  | 824             | 2.7  |          |

| Variable                        | Level       | Overall<br>(N=258995) |        | Q1<br>(N=57640) |       | Q2<br>(N=70336) |        | Q3<br>(N=50950) |        | Q4<br>(N=49100) |        | Q5<br>(N=30969) |        | P-value+ |
|---------------------------------|-------------|-----------------------|--------|-----------------|-------|-----------------|--------|-----------------|--------|-----------------|--------|-----------------|--------|----------|
| Medical History Panel Missing   | Yes         | 11092                 | 4.3    | 2400            | 4.2   | 4201            | 6.0    | 1103            | 2.2    | 2564            | 5.2    | 824             | 2.7    | <.0001   |
|                                 | No          | 247903                | 95.7   | 55240           | 95.8  | 66135           | 94.0   | 49847           | 97.8   | 46536           | 94.8   | 30145           | 97.3   |          |
| Smoking                         | Yes         | 21524                 | 8.4    | 3862            | 6.9   | 5495            | 8.0    | 4450            | 8.8    | 4692            | 9.6    | 3025            | 9.8    | <.0001   |
|                                 | No          | 233569                | 91.6   | 51953           | 93.1  | 63428           | 92.0   | 46235           | 91.2   | 44108           | 90.4   | 27845           | 90.2   |          |
|                                 | Missing     | 3902                  | 1.5    | 1825            | 3.2   | 1413            | 2.0    | 265             | 0.5    | 300             | 0.6    | 99              | 0.3    |          |
| <u>Hospital Characteristics</u> |             |                       |        |                 |       |                 |        |                 |        |                 |        |                 |        |          |
| Number of Beds*                 | Median      | 251190                | 360.0  | 57223           | 303.0 | 69257           | 383.0  | 48644           | 379.0  | 47652           | 370.0  | 28414           | 376.0  | <.0001   |
|                                 | 25th        |                       | 228.0  |                 | 232.0 |                 | 218.0  |                 | 260.0  |                 | 200.0  |                 | 235.0  |          |
|                                 | 75th        |                       | 510.0  |                 | 391.0 |                 | 628.0  |                 | 583.0  |                 | 524.0  |                 | 483.0  |          |
|                                 | Mean        |                       | 397.7  |                 | 313.4 |                 | 435.4  |                 | 436.1  |                 | 387.5  |                 | 427.3  |          |
|                                 | STD         |                       | 239.3  |                 | 145.2 |                 | 275.3  |                 | 244.7  |                 | 223.9  |                 | 266.4  |          |
|                                 | Min         |                       | 11.0   |                 | 18.0  |                 | 55.0   |                 | 25.0   |                 | 24.0   |                 | 11.0   |          |
|                                 | Max         |                       | 2574.0 |                 | 979.0 |                 | 1049.0 |                 | 1307.0 |                 | 1390.0 |                 | 2574.0 |          |
|                                 | Missing (%) |                       | 3.0    |                 | 0.7   |                 | 1.5    |                 | 4.5    |                 | 2.9    |                 | 8.3    |          |
| Geographic Region               | West        | 32315                 | 12.5   | 6244            | 10.8  | 6127            | 8.7    | 8969            | 17.6   | 3852            | 7.8    | 7123            | 23.0   | <.0001   |
|                                 | South       | 82542                 | 31.9   | 14151           | 24.6  | 19496           | 27.7   | 16928           | 33.2   | 20203           | 41.1   | 11764           | 38.0   |          |
|                                 | Midwest     | 67237                 | 26.0   | 19060           | 33.1  | 23355           | 33.2   | 15899           | 31.2   | 5722            | 11.7   | 3201            | 10.3   |          |
|                                 | Northeast   | 76901                 | 29.7   | 18185           | 31.5  | 21358           | 30.4   | 9154            | 18.0   | 19323           | 39.4   | 8881            | 28.7   |          |
| Rural Location                  | Yes         | 11411                 | 4.5    | 407             | 0.7   | 1961            | 2.8    | 2362            | 4.7    | 4519            | 9.5    | 2162            | 7.2    | <.0001   |
|                                 | No          | 240408                | 95.5   | 53920           | 99.3  | 67748           | 97.2   | 47799           | 95.3   | 42918           | 90.5   | 28023           | 92.8   |          |
|                                 | Missing     | 7176                  | 2.8    | 3313            | 5.7   | 627             | 0.9    | 789             | 1.5    | 1663            | 3.4    | 784             | 2.5    |          |

| Variable                  | Level   | Overall<br>(N=258995) |      | Q1<br>(N=57640) |      | Q2<br>(N=70336) |      | Q3<br>(N=50950) |      | Q4<br>(N=49100) |      | Q5<br>(N=30969) |      | P-value+ |
|---------------------------|---------|-----------------------|------|-----------------|------|-----------------|------|-----------------|------|-----------------|------|-----------------|------|----------|
| Teaching Status           | Yes     | 179119                | 71.4 | 29310           | 51.6 | 53102           | 77.0 | 38795           | 79.6 | 35011           | 72.4 | 22901           | 81.7 | <.0001   |
|                           | No      | 71787                 | 28.6 | 27517           | 48.4 | 15858           | 23.0 | 9931            | 20.4 | 13336           | 27.6 | 5145            | 18.3 |          |
|                           | Missing | 8089                  | 3.1  | 813             | 1.4  | 1376            | 2.0  | 2224            | 4.4  | 753             | 1.5  | 2923            | 9.4  |          |
| Heart Transplant Hospital | Yes     | 18292                 | 10.0 | 2537            | 6.5  | 4918            | 9.1  | 8983            | 24.7 | 1683            | 4.8  | 171             | 0.9  | <.0001   |
|                           | No      | 165277                | 90.0 | 36558           | 93.5 | 49087           | 90.9 | 27326           | 75.3 | 33547           | 95.2 | 18759           | 99.1 |          |
|                           | Missing | 75426                 | 29.1 | 18545           | 32.2 | 16331           | 23.2 | 14641           | 28.7 | 13870           | 28.2 | 12039           | 38.9 |          |

**eTable 4A**

| Variable                        | Level       | Overall<br>(N=455) |        | Q1<br>(N=91) |       | Q2<br>(N=91) |        | Q3<br>(N=91) |        | Q4<br>(N=91) |        | Q5<br>(N=91) |        | P-value+ |
|---------------------------------|-------------|--------------------|--------|--------------|-------|--------------|--------|--------------|--------|--------------|--------|--------------|--------|----------|
| <u>Hospital Characteristics</u> |             |                    |        |              |       |              |        |              |        |              |        |              |        |          |
| Number of Beds*                 | Median      | 423                | 276.0  | 88           | 254.0 | 87           | 238.0  | 84           | 309.5  | 86           | 270.0  | 78           | 342.5  | 0.0467   |
|                                 | 25th        |                    | 160.0  |              | 145.0 |              | 164.0  |              | 206.5  |              | 158.0  |              | 179.0  |          |
|                                 | 75th        |                    | 432.0  |              | 379.0 |              | 432.0  |              | 457.5  |              | 417.0  |              | 482.0  |          |
|                                 | Mean        |                    | 332.1  |              | 284.3 |              | 311.0  |              | 367.6  |              | 320.2  |              | 384.5  |          |
|                                 | STD         |                    | 249.5  |              | 178.2 |              | 214.2  |              | 261.3  |              | 231.2  |              | 337.8  |          |
|                                 | Min         |                    | 11.0   |              | 18.0  |              | 55.0   |              | 25.0   |              | 24.0   |              | 11.0   |          |
|                                 | Max         |                    |        |              | 979.0 |              |        |              |        |              |        |              |        |          |
|                                 | Missing (%) |                    | 2574.0 | 7.0          |       | 3.3          | 1049.0 | 4.4          | 1307.0 | 7.7          | 1390.0 | 5.5          | 2574.0 |          |
| Geographic Region               | West        | 75                 | 16.5   | 14           | 15.4  | 14           | 15.4   | 15           | 16.5   | 10           | 11.0   | 22           | 24.2   | 0.0003   |
|                                 | South       | 152                | 33.4   | 25           | 27.5  | 25           | 27.5   | 29           | 31.9   | 39           | 42.9   | 34           | 37.4   |          |
|                                 | Midwest     | 111                | 24.4   | 31           | 34.1  | 28           | 30.8   | 28           | 30.8   | 14           | 15.4   | 10           | 11.0   |          |
|                                 | Northeast   | 117                | 25.7   | 21           | 23.1  | 24           | 26.4   | 19           | 20.9   | 28           | 30.8   | 25           | 27.5   |          |
| Rural Location                  | Yes         | 40                 | 9.2    | 2            | 2.4   | 6            | 6.7    | 11           | 12.6   | 10           | 11.6   | 11           | 12.2   | 0.0123   |
|                                 | No          | 397                | 90.8   | 83           | 97.6  | 83           | 93.3   | 76           | 87.4   | 76           | 88.4   | 79           | 87.8   |          |
|                                 | Missing     | 18                 | 4.0    | 6            | 6.6   | 2            | 2.2    | 4            | 4.4    | 5            | 5.5    | 1            | 1.1    |          |
| Teaching Status                 | Yes         | 271                | 63.9   | 49           | 55.1  | 54           | 62.8   | 56           | 65.9   | 53           | 60.9   | 59           | 76.6   | 0.0158   |

| Variable                     | Level       | Overall<br>(N=455) |      | Q1<br>(N=91) |      | Q2<br>(N=91) |      | Q3<br>(N=91) |      | Q4<br>(N=91) |      | Q5<br>(N=91) |      | P-value+ |
|------------------------------|-------------|--------------------|------|--------------|------|--------------|------|--------------|------|--------------|------|--------------|------|----------|
|                              | No          | 153                | 36.1 | 40           | 44.9 | 32           | 37.2 | 29           | 34.1 | 34           | 39.1 | 18           | 23.4 |          |
|                              | Missing     | 31                 | 6.8  | 2            | 2.2  | 5            | 5.5  | 6            | 6.6  | 4            | 4.4  | 14           | 15.4 |          |
| Heart Transplant<br>Hospital | Yes         | 20                 | 7.3  | 2            | 3.5  | 4            | 6.5  | 8            | 15.7 | 4            | 7.8  | 2            | 3.8  |          |
|                              | No          | 253                | 92.7 | 55           | 96.5 | 58           | 93.5 | 43           | 84.3 | 47           | 92.2 | 50           | 96.2 |          |
|                              | Missing     | 182                | 40.0 | 34           | 37.4 | 29           | 31.9 | 40           | 44.0 | 40           | 44.0 | 39           | 42.9 |          |
| Dual Eligibility Rate*       | Median      | 455                | 20.2 | 91           | 11.0 | 91           | 15.5 | 91           | 20.2 | 91           | 26.5 | 91           | 45.9 |          |
|                              | 25th        |                    | 14.5 |              | 8.9  |              | 14.5 |              | 19.0 |              | 25.2 |              | 36.1 |          |
|                              | 75th        |                    | 29.4 |              | 12.0 |              | 16.5 |              | 21.3 |              | 29.4 |              | 56.6 |          |
|                              | Mean        |                    | 24.1 |              | 10.1 |              | 15.5 |              | 20.2 |              | 27.0 |              | 47.8 |          |
|                              | STD         |                    | 14.5 |              | 2.8  |              | 1.2  |              | 1.6  |              | 2.4  |              | 13.1 |          |
|                              | Min         |                    | 0.0  |              | 0.0  |              | 13.3 |              | 17.4 |              | 23.2 |              | 32.0 |          |
|                              | Max         |                    | 83.3 |              | 13.3 |              | 17.4 |              | 23.2 |              | 31.9 |              | 83.3 |          |
|                              | Missing (%) |                    | 0.0  |              | 0.0  |              | 0.0  |              | 0.0  |              | 0.0  |              | 0.0  |          |

Footnote on p-values:

+ P-values are based on ANOVA row mean scores statistics for categorical row variables.

\* P-values are based on the Mantel-Haenszel correlation statistics for continuous/ordinal row variables (designated by \*).

**eTable 5.** Composite Measures: Patient-Level Mean-Based Method, and Opportunity-Based Methods by Hospital and by DE Quintiles

| a) Patient-level, mean-based calculation (or equal weight linear combination score, variable presented in Table 2 and S2) |             |           |      |           |      |           |      |           |      |           |      |           |      |          |              |
|---------------------------------------------------------------------------------------------------------------------------|-------------|-----------|------|-----------|------|-----------|------|-----------|------|-----------|------|-----------|------|----------|--------------|
| Variable                                                                                                                  | Level       | Overall   |      | Q1        |      | Q2        |      | Q3        |      | Q4        |      | Q5        |      | P-value+ | % Std. Diff. |
| CMS linked, primary analysis cohort                                                                                       |             | N=258,995 |      | N= 57,640 |      | N= 70,336 |      | N= 50,950 |      | N= 49,100 |      | N= 30,969 |      |          |              |
| HF Composite Performance: Adherence Rate, %*                                                                              | Median      | 226950    | 100  | 50112     | 100  | 61238     | 100  | 44589     | 100  | 43703     | 100  | 27308     | 100  | <.0001   | 14.9         |
|                                                                                                                           | 25th        |           | 75   |           | 75   |           | 75   |           | 66.7 |           | 75   |           | 66.7 |          |              |
|                                                                                                                           | 75th        |           | 100  |           | 100  |           | 100  |           | 100  |           | 100  |           | 100  |          |              |
|                                                                                                                           | Mean        |           | 86.2 |           | 88.0 |           | 86.9 |           | 84.3 |           | 86.1 |           | 84.4 |          |              |
|                                                                                                                           | STD         |           | 23.0 |           | 21.9 |           | 22.4 |           | 23.8 |           | 22.9 |           | 24.8 |          |              |
|                                                                                                                           | Min         |           | 0    |           | 0    |           | 0    |           | 0    |           | 0    |           | 0    |          |              |
|                                                                                                                           | Max         |           | 100  |           | 100  |           | 100  |           | 100  |           | 100  |           | 100  |          |              |
|                                                                                                                           | Missing (%) |           | 12.4 |           | 13.1 |           | 12.9 |           | 12.5 |           | 11   |           | 11.8 |          |              |
| Registry, exploratory analysis cohort                                                                                     |             | N=430,015 |      | N=95,148  |      | N=110,746 |      | N=87,679  |      | N=75,668  |      | N=60,774  |      |          |              |
| HF Composite Performance: Adherence Rate, %*                                                                              | Median      | 377357    | 100  | 83198     | 100  | 96561     | 100  | 76694     | 100  | 67398     | 100  | 53506     | 100  | <.0001   | 14.0         |
|                                                                                                                           | 25th        |           | 75   |           | 75   |           | 75   |           | 66.7 |           | 75   |           | 66.7 |          |              |
|                                                                                                                           | 75th        |           | 100  |           | 100  |           | 100  |           | 100  |           | 100  |           | 100  |          |              |
|                                                                                                                           | Mean        |           | 86.0 |           | 87.7 |           | 86.7 |           | 84.3 |           | 86.1 |           | 84.3 |          |              |
|                                                                                                                           | STD         |           | 23.0 |           | 21.9 |           | 22.4 |           | 23.7 |           | 22.8 |           | 24.9 |          |              |
|                                                                                                                           | Min         |           | 0    |           | 0    |           | 0    |           | 0    |           | 0    |           | 0    |          |              |
|                                                                                                                           | Max         |           | 100  |           | 100  |           | 100  |           | 100  |           | 100  |           | 100  |          |              |
|                                                                                                                           | Missing (%) |           | 12.2 |           | 12.6 |           | 12.8 |           | 12.5 |           | 10.9 |           | 12   |          |              |
| b) Hospital-level, opportunity-based calculation                                                                          |             |           |      |           |      |           |      |           |      |           |      |           |      |          |              |
| Variable                                                                                                                  | Level       | Overall   |      | Q1        |      | Q2        |      | Q3        |      | Q4        |      | Q5        |      | P-value+ | % Std. Diff. |
| CMS linked, primary analysis cohort                                                                                       |             | (N=455)   |      | (N=91)    |      |          |              |
| Composite Measure (hospital level)*                                                                                       | Median      | 455       | 85   | 91        | 87.5 | 91        | 87   | 91        | 84   | 91        | 83.9 | 91        | 82.9 | 0.3877   | 20.5         |
|                                                                                                                           | 25th        |           | 75.4 |           | 79.6 |           | 78.9 |           | 76.4 |           | 71.9 |           | 72.7 |          |              |
|                                                                                                                           | 75th        |           | 92.2 |           | 92.4 |           | 92.1 |           | 91.4 |           | 92.3 |           | 92.1 |          |              |
|                                                                                                                           | Mean        |           | 82.7 |           | 83.9 |           | 84.1 |           | 82.2 |           | 81.8 |           | 81.3 |          |              |
|                                                                                                                           | STD         |           | 12.2 |           | 12.0 |           | 11.6 |           | 11.2 |           | 12.4 |           | 13.6 |          |              |
|                                                                                                                           | Min         |           | 32.8 |           | 39.4 |           | 35.6 |           | 52.1 |           | 33.8 |           | 32.8 |          |              |
|                                                                                                                           | Max         |           | 100  |           | 98.1 |           | 100  |           | 98.1 |           | 100  |           | 100  |          |              |
|                                                                                                                           | Missing (%) |           | 0    |           | 0    |           | 0    |           | 0    |           | 0    |           | 0    |          |              |
| Variable                                                                                                                  | Level       | Overall   |      | Q1        |      | Q2        |      | Q3        |      | Q4        |      | Q5        |      | P-       | % Std. Diff. |

|                                               |             | (N=455) |      | (N=91) |      | value+ |      |
|-----------------------------------------------|-------------|---------|------|--------|------|--------|------|--------|------|--------|------|--------|------|--------|------|
| Registry, exploratory analysis cohort         |             |         |      |        |      |        |      |        |      |        |      |        |      |        |      |
| Composite Measure (hospital level, registry)* | Median      | 455     | 85.6 | 91     | 87.8 | 91     | 86.8 | 91     | 84.1 | 91     | 84.6 | 91     | 83.3 | 0.2840 | 26.5 |
|                                               | 25th        |         | 74.8 |        | 80.9 |        | 79.4 |        | 75   |        | 70.8 |        | 71.3 |        |      |
|                                               | 75th        |         | 92.2 |        | 92.5 |        | 92.2 |        | 91.6 |        | 92.5 |        | 92.7 |        |      |
|                                               | Mean        |         | 82.6 |        | 84.3 |        | 84.0 |        | 82.1 |        | 81.6 |        | 80.9 |        |      |
|                                               | STD         |         | 12.2 |        | 12.0 |        | 11.3 |        | 11.4 |        | 12.6 |        | 13.6 |        |      |
|                                               | Min         |         | 34.8 |        | 38   |        | 45.5 |        | 52.7 |        | 34.8 |        | 35.4 |        |      |
|                                               | Max         |         | 99.8 |        | 97.9 |        | 98.9 |        | 97.9 |        | 98.5 |        | 99.8 |        |      |
|                                               | Missing (%) |         | 0    |        | 0    |        | 0    |        | 0    |        | 0    |        | 0    |        |      |

c) By DE quintile, opportunity-based calculation

|         | CMS linked cohort |        |        | Registry cohort   |        |        |                   |
|---------|-------------------|--------|--------|-------------------|--------|--------|-------------------|
|         | DE quintile       | N Met  | N Elig | Composite Measure | N Met  | N Elig | Composite Measure |
| 1       | 94723             | 108723 | 87.1   | 161385            | 185291 | 87.1   |                   |
| 2       | 115414            | 134482 | 85.8   | 184498            | 215129 | 85.8   |                   |
| 3       | 83900             | 100330 | 83.6   | 145651            | 173999 | 83.7   |                   |
| 4       | 83535             | 97938  | 85.3   | 130643            | 152968 | 85.4   |                   |
| 5       | 50798             | 60525  | 83.9   | 104370            | 123871 | 84.3   |                   |
| Mean    |                   |        | 85.2   |                   |        | 85.2   |                   |
| STD     |                   |        | 1.4    |                   |        | 1.3    |                   |
| Overall | 428370            | 501998 | 85.3   | 726547            | 851258 | 85.3   |                   |



**eTable 6.** Associations of Guideline-Based Care, and In-Hospital or 30d Outcomes With Dual Eligible Quintiles

| Outcomes                                              | DE Quintiles | Unadjusted Analysis |          | Adjusted Analysis |          |
|-------------------------------------------------------|--------------|---------------------|----------|-------------------|----------|
|                                                       |              | OR (95% CI)         | P Value  | OR (95% CI)       | P Value  |
| <b>Achievement Measures</b>                           |              |                     |          |                   |          |
| ACEI/ARB or ARNI at Discharge                         | Q5           | 0.88 (0.60, 1.30)   | 0.5228   | 0.85 (0.57, 1.27) | 0.4146   |
|                                                       | Q4           | 1.10 (0.79, 1.52)   | 0.5775   | 1.05 (0.76, 1.45) | 0.7736   |
|                                                       | Q3           | 0.94 (0.69, 1.28)   | 0.7103   | 0.96 (0.69, 1.33) | 0.8001   |
|                                                       | Q2           | 1.04 (0.75, 1.46)   | 0.8033   | 0.99 (0.71, 1.37) | 0.9321   |
|                                                       | Q1           | Reference           |          | Reference         |          |
| Evidence-Based Specific Beta Blockers                 | Q5           | 0.80 (0.58, 1.11)   | 0.1806   | 0.70 (0.52, 0.94) | 0.0165 * |
|                                                       | Q4           | 0.84 (0.64, 1.12)   | 0.2382   | 0.79 (0.61, 1.02) | 0.0657   |
|                                                       | Q3           | 0.86 (0.64, 1.17)   | 0.3442   | 0.78 (0.58, 1.04) | 0.0950   |
|                                                       | Q2           | 0.80 (0.58, 1.10)   | 0.1666   | 0.78 (0.60, 1.02) | 0.0693   |
|                                                       | Q1           | Reference           |          | Reference         |          |
| Measure LV Function                                   | Q5           | 0.40 (0.20, 0.79)   | 0.0086 * | 0.39 (0.21, 0.72) | 0.0024 * |
|                                                       | Q4           | 0.88 (0.55, 1.39)   | 0.5779   | 0.81 (0.51, 1.29) | 0.3765   |
|                                                       | Q3           | 0.72 (0.44, 1.18)   | 0.1914   | 0.61 (0.37, 0.99) | 0.0450 * |
|                                                       | Q2           | 1.21 (0.75, 1.97)   | 0.4344   | 1.00 (0.61, 1.65) | 0.9924   |
|                                                       | Q1           | Reference           |          | Reference         |          |
| Post Discharge Appointment for Heart Failure Patients | Q5           | 0.70 (0.48, 1.04)   | 0.0784   | 0.74 (0.51, 1.08) | 0.1146   |
|                                                       | Q4           | 0.75 (0.54, 1.05)   | 0.0980   | 0.78 (0.56, 1.08) | 0.1281   |
|                                                       | Q3           | 0.61 (0.43, 0.86)   | 0.0045 * | 0.53 (0.38, 0.74) | 0.0002 * |
|                                                       | Q2           | 0.79 (0.59, 1.06)   | 0.1179   | 0.72 (0.54, 0.96) | 0.0230 * |
|                                                       | Q1           | Reference           |          | Reference         |          |
| HF Defect-Free Care: 100% Compliance                  | Q5           | 0.72 (0.54, 0.98)   | 0.0336 * | 0.80 (0.60, 1.07) | 0.1290   |
|                                                       | Q4           | 0.79 (0.59, 1.06)   | 0.1125   | 0.84 (0.64, 1.10) | 0.1967   |
|                                                       | Q3           | 0.64 (0.48, 0.85)   | 0.0019 * | 0.60 (0.46, 0.78) | 0.0002 * |
|                                                       | Q2           | 0.83 (0.65, 1.07)   | 0.1529   | 0.78 (0.62, 0.99) | 0.0426 * |
|                                                       | Q1           | Reference           |          | Reference         |          |
| <b>Other Outcomes</b>                                 |              |                     |          |                   |          |
| In-hospital Mortality                                 | Q5           | 1.03 (0.87, 1.21)   | 0.7401   | 1.13 (0.97, 1.32) | 0.1106   |
|                                                       | Q4           | 1.03 (0.89, 1.19)   | 0.6886   | 1.03 (0.88, 1.19) | 0.7261   |
|                                                       | Q3           | 1.20 (1.03, 1.40)   | 0.0171 * | 1.26 (1.08, 1.46) | 0.0026 * |
|                                                       | Q2           | 1.06 (0.90, 1.25)   | 0.4944   | 1.07 (0.92, 1.23) | 0.4009   |
|                                                       | Q1           | Reference           |          | Reference         |          |
| Length of Stay >=4 days                               | Q5           | 1.12 (1.00, 1.27)   | 0.0562   | 1.05 (0.93, 1.19) | 0.4005   |
|                                                       | Q4           | 1.12 (0.97, 1.30)   | 0.1188   | 1.05 (0.94, 1.18) | 0.3888   |
|                                                       | Q3           | 1.04 (0.92, 1.19)   | 0.5291   | 0.99 (0.88, 1.11) | 0.8363   |

| Outcomes                                                  | DE Quintiles | Unadjusted Analysis |          | Adjusted Analysis |          |
|-----------------------------------------------------------|--------------|---------------------|----------|-------------------|----------|
|                                                           |              | OR (95% CI)         | P Value  | OR (95% CI)       | P Value  |
| Aldosterone Antagonist at Discharge                       | Q2           | 1.02 (0.91, 1.15)   | 0.7126   | 0.95 (0.85, 1.06) | 0.3428   |
|                                                           | Q1           | Reference           |          | Reference         |          |
|                                                           | Q5           | 0.96 (0.73, 1.26)   | 0.7814   | 0.83 (0.62, 1.11) | 0.2186   |
|                                                           | Q4           | 0.81 (0.63, 1.03)   | 0.0831   | 0.72 (0.57, 0.91) | 0.0056 * |
|                                                           | Q3           | 1.19 (0.95, 1.48)   | 0.1368   | 1.07 (0.86, 1.35) | 0.5372   |
| Hydralazine Nitrate at Discharge                          | Q2           | 0.98 (0.77, 1.25)   | 0.8949   | 0.94 (0.75, 1.17) | 0.5924   |
|                                                           | Q1           | Reference           |          | Reference         |          |
|                                                           | Q5           | 0.90 (0.50, 1.62)   | 0.7167   | 1.05 (0.51, 2.13) | 0.9032   |
|                                                           | Q4           | 0.40 (0.22, 0.71)   | 0.0018 * | 0.44 (0.22, 0.88) | 0.0212   |
|                                                           | Q3           | 1.12 (0.58, 2.19)   | 0.7318   | 1.01 (0.49, 2.09) | 0.9751   |
| Anticoagulation for Atrial fibrillation or Atrial Flutter | Q2           | 0.76 (0.42, 1.36)   | 0.3529   | 0.65 (0.34, 1.25) | 0.1981   |
|                                                           | Q1           | Reference           |          | Reference         |          |
|                                                           | Q5           | 0.65 (0.49, 0.86)   | 0.0030 * | 0.68 (0.51, 0.91) | 0.0100 * |
|                                                           | Q4           | 0.74 (0.56, 0.99)   | 0.0397 * | 0.67 (0.52, 0.85) | 0.0013 * |
|                                                           | Q3           | 0.81 (0.61, 1.09)   | 0.1688   | 0.84 (0.64, 1.11) | 0.2163   |
| DVT Prophylaxis                                           | Q2           | 1.08 (0.81, 1.43)   | 0.6148   | 1.03 (0.80, 1.33) | 0.7926   |
|                                                           | Q1           | Reference           |          | Reference         |          |
|                                                           | Q5           | 1.14 (0.78, 1.65)   | 0.5012   | 1.13 (0.77, 1.65) | 0.5292   |
|                                                           | Q4           | 0.80 (0.44, 1.44)   | 0.4502   | 0.86 (0.55, 1.34) | 0.4961   |
|                                                           | Q3           | 1.33 (0.91, 1.95)   | 0.1447   | 1.30 (0.92, 1.85) | 0.1411   |
| Influenza Vaccination During Flu Season                   | Q2           | 0.90 (0.55, 1.46)   | 0.6674   | 0.99 (0.65, 1.51) | 0.9649   |
|                                                           | Q1           | Reference           |          | Reference         |          |
|                                                           | Q5           | 0.89 (0.48, 1.64)   | 0.7092   | 0.88 (0.43, 1.83) | 0.7362   |
|                                                           | Q4           | 1.07 (0.53, 2.15)   | 0.8544   | 1.15 (0.55, 2.40) | 0.7028   |
|                                                           | Q3           | 1.19 (0.63, 2.24)   | 0.5927   | 1.02 (0.52, 2.01) | 0.9457   |
| Pneumococcal Vaccination                                  | Q2           | 1.23 (0.66, 2.31)   | 0.5140   | 1.34 (0.65, 2.74) | 0.4295   |
|                                                           | Q1           | Reference           |          | Reference         |          |
|                                                           | Q5           | 1.07 (0.61, 1.86)   | 0.8101   | 1.09 (0.56, 2.15) | 0.7981   |
|                                                           | Q4           | 1.07 (0.57, 1.99)   | 0.8399   | 1.11 (0.58, 2.12) | 0.7598   |
|                                                           | Q3           | 1.14 (0.62, 2.07)   | 0.6765   | 1.11 (0.57, 2.16) | 0.7480   |
| Discharge Instructions                                    | Q2           | 1.07 (0.62, 1.86)   | 0.8004   | 1.19 (0.64, 2.19) | 0.5825   |
|                                                           | Q1           | Reference           |          | Reference         |          |
|                                                           | Q5           | 0.92 (0.45, 1.86)   | 0.8117   | 0.83 (0.41, 1.68) | 0.6099   |
|                                                           | Q4           | 1.27 (0.74, 2.17)   | 0.3914   | 1.19 (0.71, 1.99) | 0.5150   |
|                                                           | Q3           | 0.95 (0.56, 1.62)   | 0.8627   | 0.87 (0.53, 1.45) | 0.6037   |
| Smoking Cessation                                         | Q2           | 1.02 (0.60, 1.75)   | 0.9285   | 0.93 (0.56, 1.53) | 0.7681   |
|                                                           | Q1           | Reference           |          | Reference         |          |
|                                                           | Q5           | 1.18 (0.60, 2.30)   | 0.6305   | 1.07 (0.55, 2.09) | 0.8318   |

| Outcomes                              | DE Quintiles | Unadjusted Analysis |         | Adjusted Analysis |          |
|---------------------------------------|--------------|---------------------|---------|-------------------|----------|
|                                       |              | OR (95% CI)         | P Value | OR (95% CI)       | P Value  |
|                                       | Q4           | 1.01 (0.55, 1.86)   | 0.9750  | 0.93 (0.51, 1.68) | 0.8049   |
|                                       | Q3           | 0.89 (0.48, 1.66)   | 0.7107  | 0.84 (0.45, 1.56) | 0.5828   |
|                                       | Q2           | 1.25 (0.68, 2.31)   | 0.4717  | 1.16 (0.64, 2.11) | 0.6225   |
|                                       | Q1           | Reference           |         | Reference         |          |
|                                       | Q5           | 0.91 (0.54, 1.54)   | 0.7360  | 0.83 (0.52, 1.30) | 0.4102   |
| Beta Blocker at Discharge             | Q4           | 0.95 (0.57, 1.56)   | 0.8307  | 0.88 (0.56, 1.36) | 0.5523   |
|                                       | Q3           | 0.92 (0.57, 1.49)   | 0.7309  | 0.80 (0.51, 1.25) | 0.3297   |
|                                       | Q2           | 1.22 (0.76, 1.97)   | 0.4040  | 1.06 (0.70, 1.59) | 0.7823   |
|                                       | Q1           | Reference           |         | Reference         |          |
|                                       | Q5           | 0.78 (0.55, 1.09)   | 0.1444  | 0.71 (0.50, 1.01) | 0.0582   |
| ICD placed or prescribed at discharge | Q4           | 0.77 (0.55, 1.09)   | 0.1477  | 0.74 (0.54, 1.02) | 0.0667   |
|                                       | Q3           | 0.87 (0.61, 1.23)   | 0.4201  | 0.76 (0.55, 1.03) | 0.0809   |
|                                       | Q2           | 0.81 (0.59, 1.10)   | 0.1727  | 0.75 (0.55, 1.03) | 0.0722   |
|                                       | Q1           | Reference           |         | Reference         |          |
|                                       | Q5           | 0.83 (0.73, 0.93)   | 0.0014  | 1.01 (0.91, 1.12) | 0.8055   |
| 30d All-Cause Mortality               | Q4           | 0.92 (0.85, 0.99)   | 0.0308  | 1.00 (0.91, 1.09) | 0.9706   |
|                                       | Q3           | 0.98 (0.91, 1.07)   | 0.7077  | 1.05 (0.97, 1.14) | 0.2065   |
|                                       | Q2           | 1.07 (0.99, 1.16)   | 0.0983  | 1.11 (1.02, 1.21) | 0.0145 * |
|                                       | Q1           | Reference           |         | Reference         |          |
|                                       | Q5           | 1.30 (1.20, 1.41)   | <.0001  | 1.24 (1.14, 1.35) | <.0001 * |
| 30d All-Cause Readmission             | Q4           | 1.18 (1.11, 1.25)   | <.0001  | 1.14 (1.07, 1.22) | <.0001 * |
|                                       | Q3           | 1.09 (1.02, 1.16)   | 0.0140  | 1.05 (0.99, 1.12) | 0.1165   |
|                                       | Q2           | 1.03 (0.98, 1.09)   | 0.2324  | 1.01 (0.95, 1.07) | 0.8453   |
|                                       | Q1           | Reference           |         | Reference         |          |
|                                       | Q5           | 1.27 (1.15, 1.41)   | <.0001  | 1.14 (1.03, 1.27) | 0.0145 * |
| 30d HF Readmission                    | Q4           | 1.24 (1.14, 1.35)   | <.0001  | 1.15 (1.06, 1.26) | 0.0013 * |
|                                       | Q3           | 1.11 (1.02, 1.20)   | 0.0153  | 1.04 (0.95, 1.13) | 0.3753   |
|                                       | Q2           | 1.06 (0.98, 1.14)   | 0.1226  | 1.01 (0.93, 1.09) | 0.7996   |
|                                       | Q1           | Reference           |         | Reference         |          |

\*statistical significance with p<0.05, angiotensin converting enzyme inhibitors, ARB: angiotensin receptor blockers, LV: left ventricle, HF: heart failure, DVT: deep vein thrombosis, ICD: implantable cardioverter defibrillator.

**eTable 7.** Adjusted Model Adding Indicator Variable for Medical History Missing (MHM)

| Outcomes                                   | DE Quintiles | Original Adjusted Analysis |         | Adjusted Analysis + MHM |             |
|--------------------------------------------|--------------|----------------------------|---------|-------------------------|-------------|
|                                            |              | OR (95% CI)                | P Value | OR (95% CI)             | P Value     |
| <b>Achievement Measures</b>                |              |                            |         |                         |             |
| ACEI/ARB or ARNI at Discharge              | Q5           | 0.85 (0.57, 1.27)          | 0.4146  | 0.84 (0.56, 1.26)       | 0.3914      |
|                                            | Q4           | 1.05 (0.76, 1.45)          | 0.7736  | 1.05 (0.76, 1.46)       | 0.7598      |
|                                            | Q3           | 0.96 (0.69, 1.33)          | 0.8001  | 0.95 (0.68, 1.32)       | 0.7549      |
|                                            | Q2           | 0.99 (0.71, 1.37)          | 0.9321  | 0.99 (0.71, 1.37)       | 0.9479      |
|                                            | Q1           | Reference                  |         | Reference               |             |
| Evidence-Based Specific Beta Blockers      | Q5           | 0.70 (0.52, 0.94)          | 0.0165  | * 0.67 (0.50, 0.92)     | 0.0126 *    |
|                                            | Q4           | 0.79 (0.61, 1.02)          | 0.0657  | 0.77 (0.59, 1.01)       | 0.0622      |
|                                            | Q3           | 0.78 (0.58, 1.04)          | 0.0950  | 0.75 (0.56, 1.01)       | 0.0597      |
|                                            | Q2           | 0.78 (0.60, 1.02)          | 0.0693  | 0.80 (0.61, 1.04)       | 0.0950      |
|                                            | Q1           | Reference                  |         | Reference               |             |
| Measure LV Function                        | Q5           | 0.39 (0.21, 0.72)          | 0.0024  | ** 0.37 (0.20, 0.69)    | 0.0016 **   |
|                                            | Q4           | 0.81 (0.51, 1.29)          | 0.3765  | 0.81 (0.51, 1.28)       | 0.3650      |
|                                            | Q3           | 0.61 (0.37, 0.99)          | 0.0450  | * 0.58 (0.35, 0.96)     | 0.0337 *    |
|                                            | Q2           | 1.00 (0.61, 1.65)          | 0.9924  | 1.01 (0.61, 1.67)       | 0.9698      |
|                                            | Q1           | Reference                  |         | Reference               |             |
| Post Discharge Appointment for HF Patients | Q5           | 0.74 (0.51, 1.08)          | 0.1146  | 0.69 (0.47, 1.02)       | 0.0631      |
|                                            | Q4           | 0.78 (0.56, 1.08)          | 0.1281  | 0.75 (0.54, 1.06)       | 0.1087      |
|                                            | Q3           | 0.53 (0.38, 0.74)          | 0.0002  | *** 0.49 (0.35, 0.69)   | <.0001 **** |
|                                            | Q2           | 0.72 (0.54, 0.96)          | 0.0230  | * 0.70 (0.52, 0.96)     | 0.0265 *    |
|                                            | Q1           | Reference                  |         | Reference               |             |
| HF Defect-Free Care: 100% Compliance       | Q5           | 0.80 (0.60, 1.07)          | 0.1290  | 0.76 (0.57, 1.03)       | 0.0749      |
|                                            | Q4           | 0.84 (0.64, 1.10)          | 0.1967  | 0.82 (0.62, 1.09)       | 0.1714      |
|                                            | Q3           | 0.60 (0.46, 0.78)          | 0.0002  | *** 0.57 (0.43, 0.75)   | <.0001 **** |
|                                            | Q2           | 0.78 (0.62, 0.99)          | 0.0426  | * 0.77 (0.60, 0.99)     | 0.0450 *    |
|                                            | Q1           | Reference                  |         | Reference               |             |
| <b>Other Outcomes</b>                      |              |                            |         |                         |             |
| In-hospital Mortality                      | Q5           | 1.13 (0.97, 1.32)          | 0.1106  | 1.17 (0.99, 1.37)       | 0.0611      |
|                                            | Q4           | 1.03 (0.88, 1.19)          | 0.7261  | 1.04 (0.89, 1.22)       | 0.6251      |
|                                            | Q3           | 1.26 (1.08, 1.46)          | 0.0026  | ** 1.29 (1.10, 1.50)    | 0.0013 **   |
|                                            | Q2           | 1.07 (0.92, 1.23)          | 0.4009  | 1.07 (0.92, 1.25)       | 0.3827      |
|                                            | Q1           | Reference                  |         | Reference               |             |
| 30d All-Cause Mortality                    | Q5           | 1.01 (0.91, 1.12)          | 0.8055  | 1.02 (0.92, 1.13)       | 0.7179      |
|                                            | Q4           | 1.00 (0.91, 1.09)          | 0.9706  | 1.00 (0.92, 1.09)       | 0.9994      |
|                                            | Q3           | 1.05 (0.97, 1.14)          | 0.2065  | 1.06 (0.98, 1.15)       | 0.1602      |

|                           |    |                   |        |      |                   |        |      |
|---------------------------|----|-------------------|--------|------|-------------------|--------|------|
|                           | Q2 | 1.11 (1.02, 1.21) | 0.0145 | *    | 1.11 (1.02, 1.20) | 0.0134 | *    |
|                           | Q1 | Reference         |        |      | Reference         |        |      |
| 30d All-Cause Readmission | Q5 | 1.24 (1.14, 1.35) | <.0001 | **** | 1.26 (1.16, 1.36) | <.0001 | **** |
|                           | Q4 | 1.14 (1.07, 1.22) | <.0001 | **** | 1.15 (1.08, 1.22) | <.0001 | **** |
|                           | Q3 | 1.05 (0.99, 1.12) | 0.1165 |      | 1.06 (1.00, 1.13) | 0.0623 |      |
|                           | Q2 | 1.01 (0.95, 1.07) | 0.8453 |      | 1.01 (0.95, 1.07) | 0.8203 |      |
|                           | Q1 | Reference         |        |      | Reference         |        |      |
| 30d HF Readmission        | Q5 | 1.14 (1.03, 1.27) | 0.0145 | *    | 1.16 (1.04, 1.28) | 0.0057 | **   |
|                           | Q4 | 1.15 (1.06, 1.26) | 0.0013 | ***  | 1.16 (1.07, 1.26) | 0.0006 | ***  |
|                           | Q3 | 1.04 (0.95, 1.13) | 0.3753 |      | 1.05 (0.97, 1.15) | 0.2289 |      |
|                           | Q2 | 1.01 (0.93, 1.09) | 0.7996 |      | 1.01 (0.93, 1.10) | 0.7679 |      |
|                           | Q1 | Reference         |        |      | Reference         |        |      |

**eTable 8.** Baseline Characteristics, Quality Metric Achievement, and In-hospital End Points in the Sensitivity Cohort by DE Quintiles

|                                | Overall<br>N=430,015 | Q1<br>(0 - <13.3)<br>N=95,148 | Q2<br>(13.3 - <17.4)<br>N=110,746 | Q3<br>(17.4 - <23.16)<br>N=87,679 | Q4<br>(23.16 - <31.9)<br>N=75,668 | Q5<br>(31.9 - 83.3)<br>N=60,774 | P Value | % Std. Diff.<br>Q1 vs Q5 |
|--------------------------------|----------------------|-------------------------------|-----------------------------------|-----------------------------------|-----------------------------------|---------------------------------|---------|--------------------------|
| Demographics                   |                      |                               |                                   |                                   |                                   |                                 |         |                          |
| Age*                           | 80 (73 - 87)         | 81 (74 - 87)                  | 81 (74 - 87)                      | 80 (72 - 86)                      | 80 (72 - 86)                      | 78 (71 - 85)                    | <.0001  | 25.2                     |
| Female                         | 225,032 (52.3)       | 49,222 (51.7)                 | 57,595 (52.0)                     | 45,154 (51.5)                     | 39,774 (52.6)                     | 33,287 (54.8)                   | <.0001  | 6.1                      |
| Race                           |                      |                               |                                   |                                   |                                   |                                 |         |                          |
| ' Other (includes UTD)         | 11,094 (2.6)         | 2,279 (2.5)                   | 2,045 (1.9)                       | 1,855 (2.1)                       | 2,248 (3.0)                       | 2,667 (4.4)                     | <.0001  | 91.1                     |
| ' Asian                        | 8,171 (1.9)          | 2,133 (2.3)                   | 2,056 (1.9)                       | 900 (1.0)                         | 1,005 (1.3)                       | 2,077 (3.4)                     |         |                          |
| ' Hispanic (any race)          | 28,159 (6.6)         | 5,282 (5.7)                   | 2,554 (2.3)                       | 2,892 (3.3)                       | 3,896 (5.2)                       | 13,535 (22.4)                   |         |                          |
| ' Black                        | 49,522 (11.7)        | 5,510 (5.9)                   | 8,615 (7.9)                       | 9,117 (10.5)                      | 11,112 (14.8)                     | 15,168 (25.1)                   |         |                          |
| ' White                        | 327,593 (77.2)       | 77,460 (83.6)                 | 94,009 (86.0)                     | 72,166 (83.0)                     | 56,969 (75.7)                     | 26,989 (44.7)                   |         |                          |
| LVEF Source                    |                      |                               |                                   |                                   |                                   |                                 |         |                          |
| ' Source of LVEF: Quantitative | 403,780 (96.3)       | 88,262 (95.6)                 | 104,534 (96.1)                    | 82,829 (96.7)                     | 71,943 (97.2)                     | 56,212 (96.3)                   | <.0001  | 3.6                      |
| ' Source of LVEF: Qualitative  | 15,330 (3.7)         | 4,057 (4.4)                   | 4,187 (3.9)                       | 2,844 (3.3)                       | 2,090 (2.8)                       | 2,152 (3.7)                     |         |                          |
| EF, %*                         | 47 (30 - 58)         | 48 (30 - 58)                  | 47 (30 - 58)                      | 45 (30 - 58)                      | 45 (30 - 58)                      | 45 (30 - 58)                    | <.0001  | 6.8                      |
| EF groups*                     |                      |                               |                                   |                                   |                                   |                                 |         |                          |
| ' 50 <= OH_EF <=100            | 203,608 (48.6)       | 46,403 (50.3)                 | 53,574 (49.3)                     | 40,966 (47.8)                     | 35,397 (47.8)                     | 27,268 (46.7)                   | <.0001  | 8.2                      |
| ' 40 < OH_EF < 50              | 40,652 (9.7)         | 9,187 (10.0)                  | 10,686 (9.8)                      | 8,402 (9.8)                       | 6,979 (9.4)                       | 5,398 (9.2)                     |         |                          |
| ' 0 <= OH_EF <= 40             | 174,850 (41.7)       | 36,729 (39.8)                 | 44,461 (40.9)                     | 36,305 (42.4)                     | 31,657 (42.8)                     | 25,698 (44.0)                   |         |                          |
| EF groups missing              | 10,905 (2.5)         | 2,829 (3.0)                   | 2,025 (1.8)                       | 2,006 (2.3)                       | 1,635 (2.2)                       | 2,410 (4.0)                     | <.0001  | 5.4                      |
| Year of HF Admission*          |                      |                               |                                   |                                   |                                   |                                 |         |                          |
| ' 2017                         | 79,894 (18.6)        | 19,288 (20.3)                 | 19,367 (17.5)                     | 15,778 (18.0)                     | 14,318 (18.9)                     | 11,143 (18.3)                   | <.0001  | 12.0                     |
| ' 2016                         | 73,032 (17.0)        | 17,514 (18.4)                 | 18,252 (16.5)                     | 15,076 (17.2)                     | 11,803 (15.6)                     | 10,387 (17.1)                   |         |                          |
| ' 2015                         | 62,190 (14.5)        | 15,352 (16.1)                 | 15,890 (14.3)                     | 12,035 (13.7)                     | 10,117 (13.4)                     | 8,796 (14.5)                    |         |                          |
| ' 2014                         | 52,713 (12.3)        | 12,237 (12.9)                 | 14,129 (12.8)                     | 10,617 (12.1)                     | 8,817 (11.7)                      | 6,913 (11.4)                    |         |                          |
| ' 2013                         | 47,554 (11.1)        | 9,887 (10.4)                  | 12,804 (11.6)                     | 10,155 (11.6)                     | 7,737 (10.2)                      | 6,971 (11.5)                    |         |                          |
| ' 2012                         | 43,933 (10.2)        | 7,940 (8.3)                   | 12,358 (11.2)                     | 9,151 (10.4)                      | 8,002 (10.6)                      | 6,482 (10.7)                    |         |                          |
| ' 2011                         | 38,895 (9.0)         | 7,213 (7.6)                   | 10,678 (9.6)                      | 7,865 (9.0)                       | 7,596 (10.0)                      | 5,543 (9.1)                     |         |                          |
| ' 2010                         | 31,804 (7.4)         | 5,717 (6.0)                   | 7,268 (6.6)                       | 7,002 (8.0)                       | 7,278 (9.6)                       | 4,539 (7.5)                     |         |                          |
| Medical History                |                      |                               |                                   |                                   |                                   |                                 |         |                          |
| Atrial Flutter/Fibrillation    | 195,738 (47.3)       | 46,132 (50.3)                 | 52,067 (49.6)                     | 40,959 (47.9)                     | 33,977 (47.0)                     | 22,603 (38.2)                   | <.0001  | 24.6                     |
| COPD or Asthma                 | 142,086 (34.3)       | 30,466 (33.2)                 | 35,851 (34.1)                     | 30,153 (35.3)                     | 25,688 (35.6)                     | 19,928 (33.6)                   | <.0001  | 0.9                      |
| Diabetes                       | 180,452 (43.6)       | 37,837 (41.2)                 | 43,820 (41.7)                     | 37,901 (44.3)                     | 32,171 (44.5)                     | 28,723 (48.5)                   | <.0001  | 14.6                     |
| Hyperlipidemia                 | 240,854 (58.2)       | 53,486 (58.3)                 | 63,818 (60.8)                     | 50,804 (59.4)                     | 42,351 (58.6)                     | 30,395 (51.3)                   | <.0001  | 14.1                     |
| Hypertension                   | 343,040 (82.9)       | 75,826 (82.6)                 | 85,301 (81.2)                     | 70,883 (82.9)                     | 60,606 (83.9)                     | 50,424 (85.1)                   | <.0001  | 6.8                      |
| Peripheral Vascular Disease    | 57,328 (13.9)        | 12,688 (13.8)                 | 15,027 (14.3)                     | 12,894 (15.1)                     | 10,451 (14.5)                     | 6,268 (10.6)                    | <.0001  | 9.9                      |
| CAD                            | 224,189 (54.2)       | 49,407 (53.9)                 | 58,068 (55.3)                     | 46,817 (54.8)                     | 40,284 (55.8)                     | 29,613 (50.0)                   | <.0001  | 7.7                      |

|                                                                                   | Overall<br>N=430,015      | Q1<br>(0 - <13.3)<br>N=95,148 | Q2<br>(13.3 - <17.4)<br>N=110,746 | Q3<br>(17.4 - <23.16)<br>N=87,679 | Q4<br>(23.16 - <31.9)<br>N=75,668 | Q5<br>(31.9 - 83.3)<br>N=60,774 | P Value | % Std. Diff.<br>Q1 vs Q5 |
|-----------------------------------------------------------------------------------|---------------------------|-------------------------------|-----------------------------------|-----------------------------------|-----------------------------------|---------------------------------|---------|--------------------------|
| Prior MI                                                                          | 88,276 (21.3)             | 18,815 (20.5)                 | 22,663 (21.6)                     | 19,045 (22.3)                     | 16,457 (22.8)                     | 11,296 (19.1)                   | <.0001  | 3.6                      |
| CVA/TIA                                                                           | 72,915 (17.6)             | 16,046 (17.5)                 | 18,895 (18.0)                     | 15,667 (18.3)                     | 12,691 (17.6)                     | 9,616 (16.2)                    | <.0001  | 3.4                      |
| ICD only                                                                          | 34,638 (8.4)              | 6,995 (7.6)                   | 9,412 (9.0)                       | 7,062 (8.3)                       | 5,941 (8.2)                       | 5,228 (8.8)                     | <.0001  | 4.4                      |
| Heart failure                                                                     | 302,750 (73.2)            | 65,267 (71.1)                 | 75,445 (71.8)                     | 63,211 (74.0)                     | 55,712 (77.1)                     | 43,115 (72.8)                   | <.0001  | 3.7                      |
| Anemia                                                                            | 99,308 (24.0)             | 20,619 (22.5)                 | 26,284 (25.0)                     | 21,866 (25.6)                     | 17,188 (23.8)                     | 13,351 (22.5)                   | <.0001  | 0.2                      |
| Pacemaker                                                                         | 70,935 (17.1)             | 16,974 (18.5)                 | 18,956 (18.1)                     | 14,288 (16.7)                     | 12,240 (16.9)                     | 8,477 (14.3)                    | <.0001  | 11.3                     |
| Dialysis, chronic                                                                 | 13,141 (3.2)              | 2,327 (2.5)                   | 2,798 (2.7)                       | 2,755 (3.2)                       | 2,171 (3.0)                       | 3,090 (5.2)                     | <.0001  | 13.9                     |
| Renal insufficiency, chronic (SCr>2.0)                                            | 108,738 (26.3)            | 22,500 (24.5)                 | 29,278 (27.9)                     | 21,863 (25.6)                     | 18,356 (25.4)                     | 16,741 (28.3)                   | <.0001  | 8.5                      |
| Depression                                                                        | 54,308 (13.1)             | 11,865 (12.9)                 | 14,469 (13.8)                     | 12,239 (14.3)                     | 9,391 (13.0)                      | 6,344 (10.7)                    | <.0001  | 6.9                      |
| Valvular Heart Disease                                                            | 91,173 (22.0)             | 20,579 (22.4)                 | 25,457 (24.2)                     | 20,109 (23.5)                     | 15,292 (21.2)                     | 9,736 (16.4)                    | <.0001  | 15.2                     |
| CRT-P                                                                             | 4,361 (1.1)               | 1,068 (1.2)                   | 1,037 (1.0)                       | 890 (1.0)                         | 864 (1.2)                         | 502 (0.8)                       | <.0001  | 3.2                      |
| CRT-D                                                                             | 25,167 (6.1)              | 5,683 (6.2)                   | 6,013 (5.7)                       | 5,637 (6.6)                       | 4,942 (6.8)                       | 2,892 (4.9)                     | <.0001  | 5.7                      |
| Ischemic Etiology: Med Hx of CAD, MI, prior<br>PCI, prior CABG, or prior PCI/CABG | 244,373 (59.1)            | 53,913 (58.8)                 | 62,889 (59.9)                     | 50,959 (59.6)                     | 44,001 (60.9)                     | 32,611 (55.1)                   | <.0001  | 7.5                      |
| Medical History Panel Missing                                                     | 16,308 (3.8)              | 3,403 (3.6)                   | 5,727 (5.2)                       | 2,204 (2.5)                       | 3,430 (4.5)                       | 1,544 (2.5)                     | <.0001  | 6.0                      |
| Smoking                                                                           | 38,329 (9.1)              | 6,823 (7.4)                   | 9,201 (8.5)                       | 8,240 (9.5)                       | 7,703 (10.2)                      | 6,362 (10.5)                    | <.0001  | 10.8                     |
| Vitals on Admission                                                               |                           |                               |                                   |                                   |                                   |                                 |         |                          |
| Heart Rate, bpm*                                                                  | 81 (70 - 95)              | 80 (70 - 94)                  | 81 (70 - 95)                      | 80 (70 - 94)                      | 81 (70 - 95)                      | 81 (70 - 95)                    | <.0001  | 5.6                      |
| SBP, mmHg*                                                                        | 138 (119 - 158)           | 137 (119 - 157)               | 138 (120 - 159)                   | 137 (119 - 157)                   | 138 (119 - 158)                   | 139 (120 - 159)                 | <.0001  | 5.1                      |
| DBP, mmHg*                                                                        | 73 (63 - 85)              | 72 (63 - 84)                  | 73 (63 - 85)                      | 73 (63 - 84)                      | 73 (62 - 85)                      | 74 (63 - 86)                    | <.0001  | 8.0                      |
| BMI*                                                                              | 27.2 (23.2 -<br>32.5)     | 26.9 (23.1 -<br>32.0)         | 27.1 (23.2 -<br>32.4)             | 27.5 (23.5 -<br>32.9)             | 27.3 (23.2 -<br>32.6)             | 27.1 (23.1 -<br>32.5)           | <.0001  | 4.3                      |
| Lipids                                                                            |                           |                               |                                   |                                   |                                   |                                 |         |                          |
| Total Cholesterol, mg/dL*                                                         | 130 (107 - 158)           | 133 (110 - 161)               | 128 (106 - 156)                   | 128 (106 - 156)                   | 129 (105 - 157)                   | 132 (109 - 161)                 | <.0001  | 0.5                      |
| HDL, mg/dL*                                                                       | 40 (32 - 50)              | 41 (33 - 51)                  | 39 (31 - 49)                      | 40 (31 - 50)                      | 39 (31 - 49)                      | 40 (32 - 51)                    | <.0001  | 4.0                      |
| LDL, mg/dL*                                                                       | 70 (53 - 92)              | 71 (54 - 93)                  | 69 (53 - 91)                      | 69 (52 - 91)                      | 70 (53 - 92)                      | 72 (55 - 95)                    | <.0001  | 5.0                      |
| Triglycerides, mg/dL*                                                             | 86 (65 - 117)             | 88 (66 - 120)                 | 83 (62 - 113)                     | 88 (66 - 120)                     | 87 (66 - 117)                     | 84 (64 - 114)                   | <.0001  | 9.9                      |
| Lab Measures                                                                      |                           |                               |                                   |                                   |                                   |                                 |         |                          |
| Serum sodium, mEq/L*                                                              | 138 (135 - 141)           | 139 (136 - 141)               | 138 (135 - 141)                   | 138 (135 - 141)                   | 139 (136 - 141)                   | 139 (136 - 141)                 | <.0001  | 2.7                      |
| Hemoglobin, g/dL*                                                                 | 11.5 (10.1 -<br>12.9)     | 11.6 (10.2 -<br>13.0)         | 11.5 (10.2 -<br>12.9)             | 11.6 (10.1 -<br>13.0)             | 11.4 (10.0 -<br>12.9)             | 11.4 (10.0 -<br>12.9)           | <.0001  | 8.4                      |
| Albumin, g/dL*                                                                    | 3.4 (3.0 - 3.7)           | 3.5 (3.1 - 3.8)               | 3.3 (3.0 - 3.6)                   | 3.4 (3.0 - 3.7)                   | 3.4 (3.0 - 3.7)                   | 3.5 (3.1 - 3.8)                 | <.0001  | 7.2                      |
| BNP, pg/mL*                                                                       | 859 (432 -<br>1,695)      | 844 (434 -<br>1,650)          | 897 (464 -<br>1,713)              | 906 (457 -<br>1,783)              | 782 (373 -<br>1,541)              | 935 (464 -<br>1,921)            | <.0001  | 10.0                     |
| NBNP, pg/mL*                                                                      | 5,682 (2,550 -<br>12,748) | 5,200 (2,428 -<br>11,354)     | 6,028 (2,814 -<br>13,342)         | 5,770 (2,582 -<br>12,875)         | 6,156 (2,710 -<br>13,746)         | 5,428 (2,198 -<br>12,846)       | <.0001  | 1.4                      |
| Serum creatinine, mg/dL*                                                          | 1.3 (1.0 - 1.9)           | 1.3 (1.0 - 1.8)               | 1.3 (1.0 - 1.8)                   | 1.3 (1.0 - 1.9)                   | 1.3 (1.0 - 1.9)                   | 1.3 (1.0 - 1.9)                 | <.0001  | 4.7                      |

|                                                    | Overall<br>N=430,015 | Q1<br>(0 - <13.3)<br>N=95,148 | Q2<br>(13.3 - <17.4)<br>N=110,746 | Q3<br>(17.4 - <23.16)<br>N=87,679 | Q4<br>(23.16 - <31.9)<br>N=75,668 | Q5<br>(31.9 - 83.3)<br>N=60,774 | P Value | % Std. Diff.<br>Q1 vs Q5 |
|----------------------------------------------------|----------------------|-------------------------------|-----------------------------------|-----------------------------------|-----------------------------------|---------------------------------|---------|--------------------------|
| BUN, mg/dL*                                        | 27 (19 - 40)         | 27 (19 - 40)                  | 27 (19 - 40)                      | 27 (19 - 40)                      | 27 (19 - 41)                      | 26 (19 - 40)                    | <.0001  | 0.6                      |
| Troponin, ng/dL*                                   | 0.04 (0.02 - 0.10)   | 0.04 (0.02 - 0.10)            | 0.04 (0.02 - 0.10)                | 0.05 (0.02 - 0.10)                | 0.04 (0.02 - 0.10)                | 0.04 (0.02 - 0.09)              | <.0001  | 12.4                     |
| Potassium, mEq/L*                                  | 4.2 (3.8 - 4.6)      | 4.2 (3.9 - 4.6)               | 4.2 (3.8 - 4.6)                   | 4.2 (3.8 - 4.6)                   | 4.2 (3.8 - 4.7)                   | 4.2 (3.8 - 4.7)                 | <.0001  | 0.3                      |
| HbA1C, %*                                          | 6.5 (5.9 - 7.5)      | 6.6 (5.9 - 7.6)               | 6.6 (5.9 - 7.6)                   | 6.4 (5.8 - 7.3)                   | 6.5 (5.9 - 7.5)                   | 6.4 (5.8 - 7.4)                 | <.0001  | 11.9                     |
| Blood Glucose, mg/dL*                              | 112 (95 - 143)       | 113 (95 - 144)                | 112 (95 - 141)                    | 110 (94 - 141)                    | 111 (94 - 144)                    | 113 (95 - 147)                  | <.0001  | 1.9                      |
| EKG QRS Duration, ms*                              | 110 (90 - 144)       | 110 (91 - 146)                | 110 (90 - 144)                    | 110 (90 - 146)                    | 108 (90 - 142)                    | 106 (90 - 140)                  | <.0001  | 10.5                     |
| Hospital Characteristics                           |                      |                               |                                   |                                   |                                   |                                 |         |                          |
| Number of Beds*                                    | 360 (232 - 508)      | 312 (232 - 394)               | 347 (213 - 604)                   | 379 (265 - 564)                   | 393 (217 - 539)                   | 382 (261 - 537)                 | <.0001  | 54.9                     |
| Geographic Region                                  |                      |                               |                                   |                                   |                                   |                                 |         |                          |
| ' West                                             | 57,780 (13.4)        | 11,673 (12.3)                 | 10,678 (9.6)                      | 15,389 (17.6)                     | 5,981 (7.9)                       | 14,059 (23.1)                   | <.0001  | 54.9                     |
| ' South                                            | 128,654 (29.9)       | 23,659 (24.9)                 | 27,149 (24.5)                     | 26,744 (30.5)                     | 29,437 (38.9)                     | 21,665 (35.6)                   |         |                          |
| ' Midwest                                          | 104,360 (24.3)       | 27,313 (28.7)                 | 35,658 (32.2)                     | 25,475 (29.1)                     | 9,614 (12.7)                      | 6,300 (10.4)                    |         |                          |
| ' Northeast                                        | 139,221 (32.4)       | 32,503 (34.2)                 | 37,261 (33.6)                     | 20,071 (22.9)                     | 30,636 (40.5)                     | 18,750 (30.9)                   |         |                          |
| Rural Location                                     | 17,959 (4.3)         | 648 (0.7)                     | 3,319 (3.0)                       | 3,851 (4.4)                       | 6,919 (9.5)                       | 3,222 (5.4)                     | <.0001  | 27.5                     |
| Teaching Status                                    | 301,715 (73.1)       | 53,346 (57.2)                 | 80,154 (74.5)                     | 65,965 (80.5)                     | 55,662 (74.9)                     | 46,588 (83.5)                   | <.0001  | 60.3                     |
| Heart Transplant Hospital                          | 29,808 (9.9)         | 4,549 (6.7)                   | 6,708 (8.1)                       | 15,681 (25.6)                     | 2,551 (4.8)                       | 319 (0.9)                       | <.0001  | 31.2                     |
| Achievement Measures                               |                      |                               |                                   |                                   |                                   |                                 |         |                          |
| ACEI/ARB or ARNI at Discharge                      | 81,144 (93.1)        | 16,662 (93.1)                 | 18,989 (93.2)                     | 16,884 (93.2)                     | 15,502 (93.8)                     | 13,107 (92.1)                   | <.0001  | 4.0                      |
| Evidence-Based Specific Beta Blockers              | 104,123 (89.1)       | 22,067 (90.4)                 | 26,158 (88.5)                     | 21,414 (89.2)                     | 18,792 (88.7)                     | 15,692 (88.7)                   | <.0001  | 5.7                      |
| Measure LV Function                                | 366,456 (99.1)       | 80,914 (99.2)                 | 94,241 (99.4)                     | 74,409 (99.1)                     | 65,809 (99.2)                     | 51,083 (97.9)                   | <.0001  | 11.3                     |
| Post Discharge Appointment for HF Patients         | 174,824 (63.0)       | 41,742 (67.9)                 | 45,110 (64.1)                     | 32,944 (58.0)                     | 30,540 (62.4)                     | 24,488 (61.6)                   | <.0001  | 13.3                     |
| HF Composite Performance: Adherence Rate, %*       | 100 (75 - 100)       | 100 (75 - 100)                | 100 (75 - 100)                    | 100 (67 - 100)                    | 100 (75 - 100)                    | 100 (67 - 100)                  | <.0001  | 14.0                     |
| HF Defect-Free Care: 100% Compliance               | 262,156 (69.5)       | 60,962 (73.3)                 | 68,360 (70.8)                     | 50,340 (65.6)                     | 46,700 (69.3)                     | 35,794 (66.9)                   | <.0001  | 14.0                     |
| Secondary Outcomes                                 |                      |                               |                                   |                                   |                                   |                                 |         |                          |
| In-hospital Mortality                              | 14,404 (3.3)         | 2,998 (3.2)                   | 3,688 (3.3)                       | 3,333 (3.8)                       | 2,500 (3.3)                       | 1,885 (3.1)                     | <.0001  | 0.3                      |
| Length of Stay*                                    | 4 (3 - 7)            | 4 (3 - 6)                     | 4 (3 - 6)                         | 4 (3 - 6)                         | 4 (3 - 7)                         | 4 (3 - 7)                       | <.0001  | 6.0                      |
| Quality Measures                                   |                      |                               |                                   |                                   |                                   |                                 |         |                          |
| Aldosterone Antagonist at Discharge                | 33,762 (35.1)        | 7,242 (35.7)                  | 8,805 (35.4)                      | 7,575 (39.2)                      | 5,375 (31.0)                      | 4,765 (33.0)                    | <.0001  | 5.8                      |
| Hydralazine Nitrate at Discharge                   | 1,865 (26.6)         | 245 (34.9)                    | 387 (26.2)                        | 350 (36.5)                        | 361 (17.9)                        | 522 (28.1)                      | <.0001  | 14.6                     |
| Anticoagulation for Atrial fibrillation or flutter | 121,425 (82.2)       | 29,416 (84.3)                 | 32,120 (85.1)                     | 25,206 (82.3)                     | 20,969 (79.1)                     | 13,714 (76.8)                   | <.0001  | 19.0                     |
| DVT Prophylaxis                                    | 146,024 (83.3)       | 32,139 (83.9)                 | 36,452 (82.1)                     | 28,855 (85.7)                     | 26,274 (80.9)                     | 22,304 (84.2)                   | <.0001  | 0.8                      |
| Influenza Vaccination During Flu Season            | 131,884 (85.2)       | 29,103 (84.0)                 | 34,981 (87.0)                     | 27,502 (86.2)                     | 23,446 (85.0)                     | 16,852 (82.8)                   | <.0001  | 3.3                      |
| Pneumococcal Vaccination                           | 255,235 (80.9)       | 56,313 (80.2)                 | 65,427 (80.4)                     | 53,620 (81.8)                     | 46,329 (81.6)                     | 33,546 (80.5)                   | <.0001  | 0.7                      |
| Reporting Measures                                 |                      |                               |                                   |                                   |                                   |                                 |         |                          |
| Discharge Instructions                             | 288,784 (93.5)       | 62,123 (93.3)                 | 74,496 (93.2)                     | 58,720 (93.2)                     | 54,772 (94.7)                     | 38,673 (92.8)                   | <.0001  | 1.9                      |



|                                       | Overall<br>N=430,015 | Q1<br>(0 - <13.3)<br>N=95,148 | Q2<br>(13.3 - <17.4)<br>N=110,746 | Q3<br>(17.4 - <23.16)<br>N=87,679 | Q4<br>(23.16 - <31.9)<br>N=75,668 | Q5<br>(31.9 - 83.3)<br>N=60,774 | P Value | % Std. Diff.<br>Q1 vs Q5 |
|---------------------------------------|----------------------|-------------------------------|-----------------------------------|-----------------------------------|-----------------------------------|---------------------------------|---------|--------------------------|
| Smoking Cessation                     | 32,030 (94.8)        | 5,677 (94.5)                  | 7,687 (95.4)                      | 6,843 (94.0)                      | 6,531 (94.9)                      | 5,292 (95.1)                    | 0.0031  | 2.6                      |
| Beta Blocker at Discharge             | 118,598 (97.5)       | 24,785 (97.5)                 | 29,969 (97.9)                     | 24,219 (97.3)                     | 21,836 (97.3)                     | 17,789 (97.3)                   | <.0001  | 0.7                      |
| ICD placed or prescribed at discharge | 43,734 (59.8)        | 8,869 (61.8)                  | 10,993 (59.1)                     | 9,381 (61.1)                      | 8,267 (59.9)                      | 6,224 (56.4)                    | <.0001  | 11.1                     |

LVEF: left ventricular ejection fraction; EF: ejection fraction; HF: heart failure, COPD: chronic obstructive pulmonary disease; CAD: coronary artery disease; MI: myocardial infarction; CVA: cerebrovascular accident; TIA: transient ischemic attack; ICD: implantable cardioverter defibrillator; Scr: serum creatinine; CRT-P: cardiac resynchronization therapy-pacemaker; CRT-D: cardiac resynchronization therapy-defibrillator; Hx: history; PCI: percutaneous coronary intervention; CABG: coronary artery bypass graft; bpm: beats per minute; SBP: systolic blood pressure; DBP: diastolic blood pressure HDL: high-density lipoprotein; LDL: low-density lipoprotein; BNP: beta natriuretic peptide; NBNP: n-terminal-pro beta natriuretic peptide; BUN: blood urea nitrogen; HbA1C: hemoglobin A1C; EKG: electrocardiogram.
